# Supplementary material for: A Prospective, Open-Label Pilot Study of Concurrent Male Partner Treatment for Bacterial Vaginosis
Source: PubMed Central journal article supplement (PMC8524345; doi:10.1128/mbio.02323-21), 2021-10-19

A

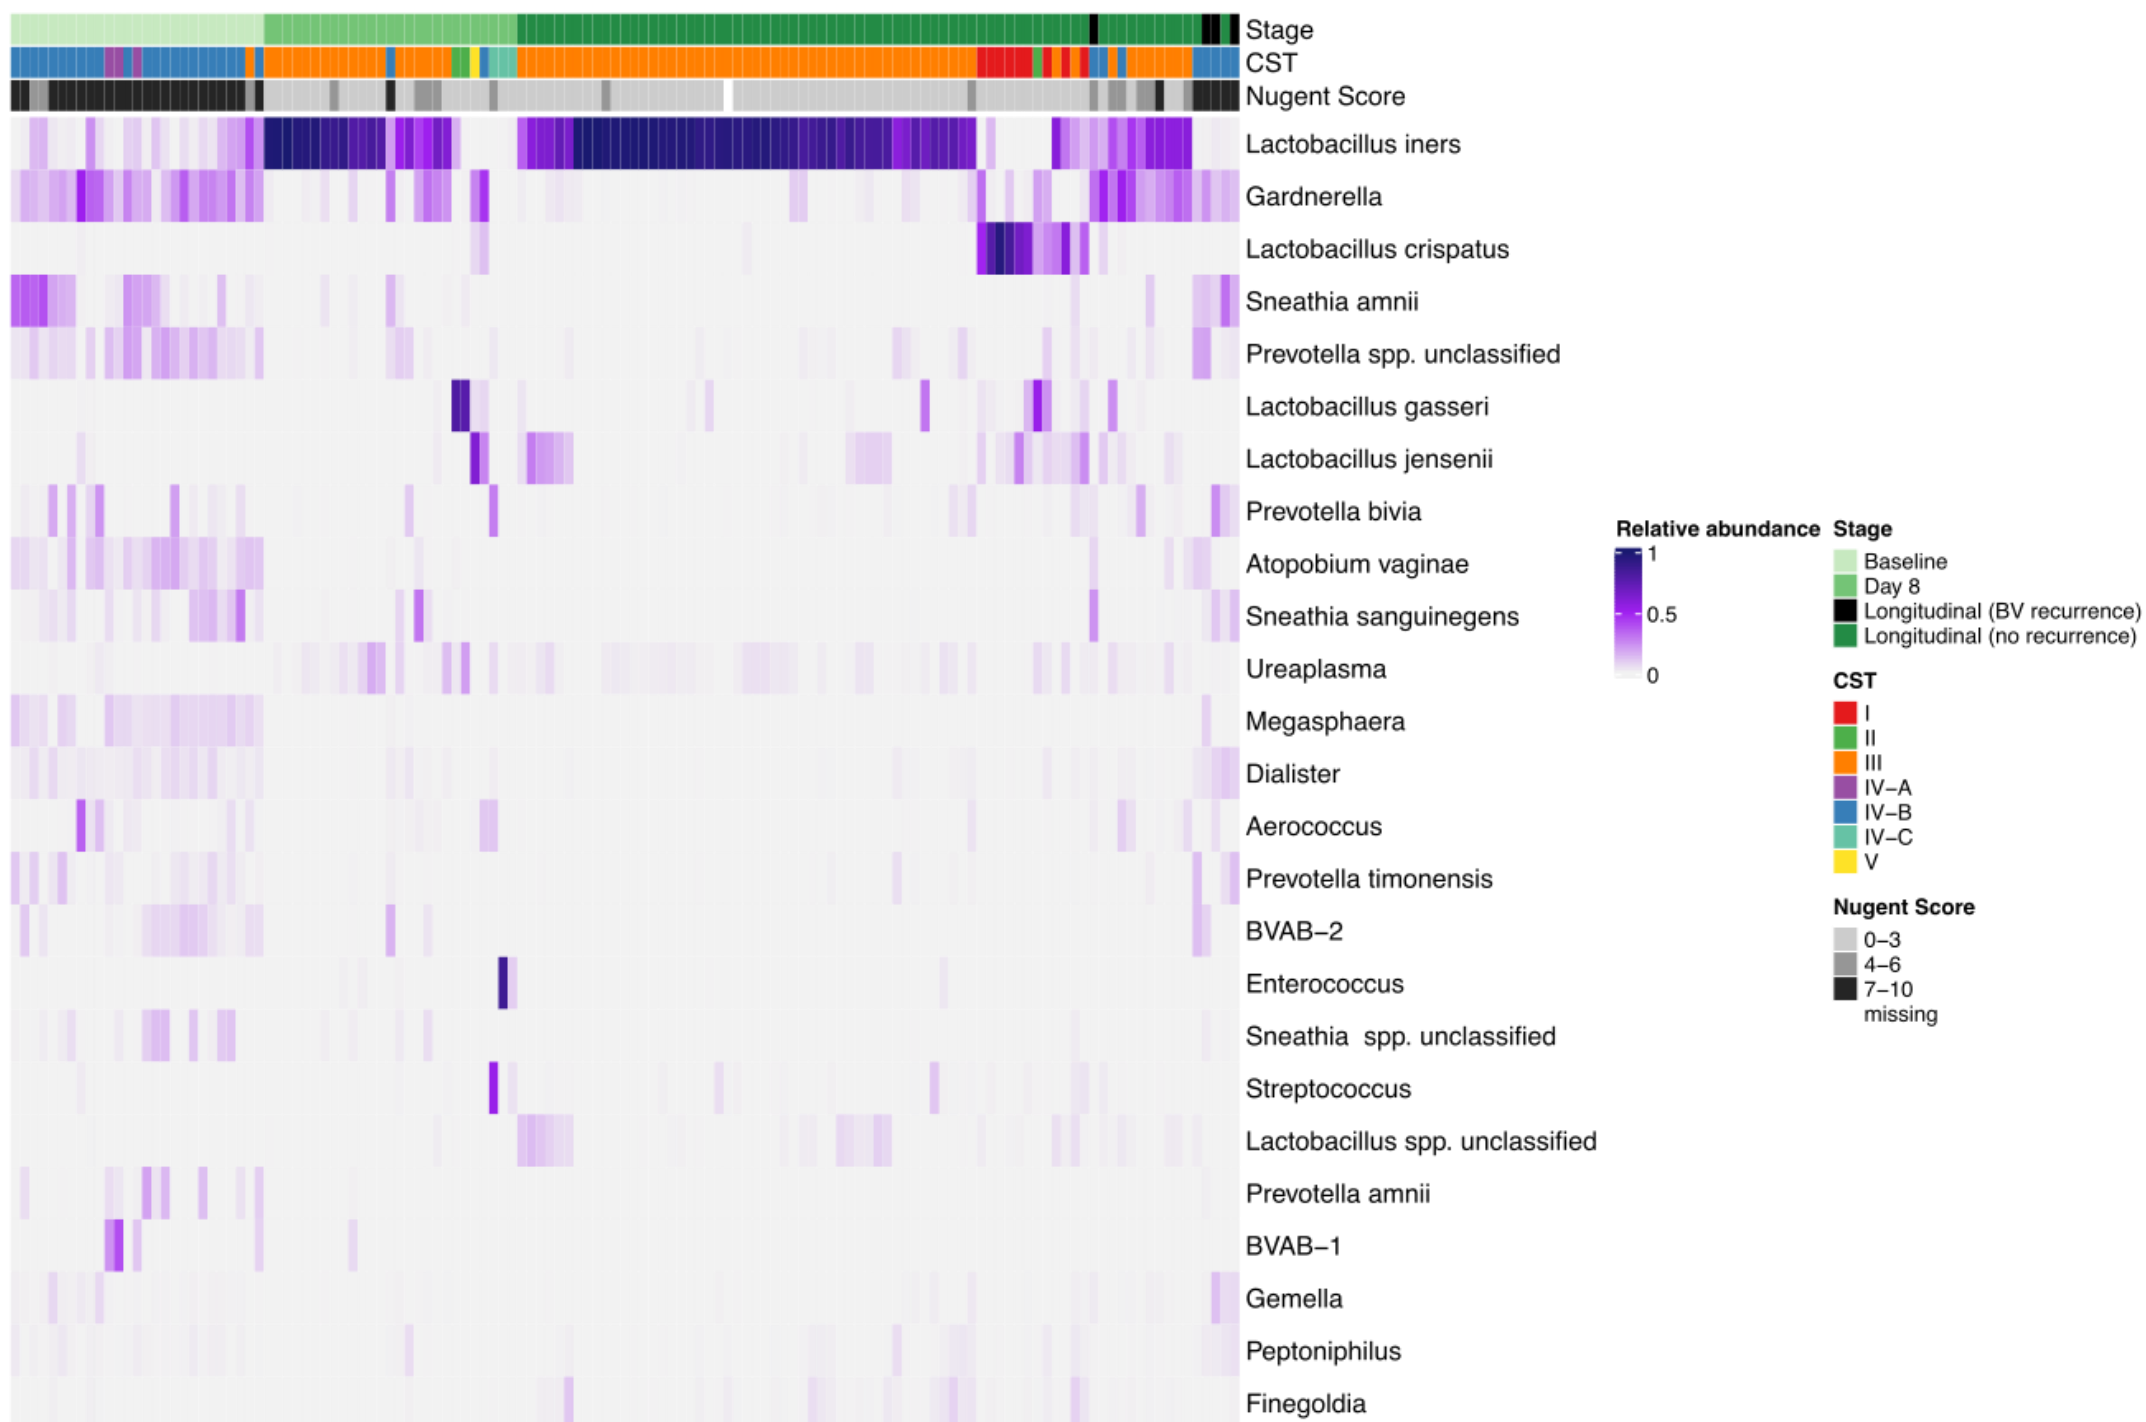

B

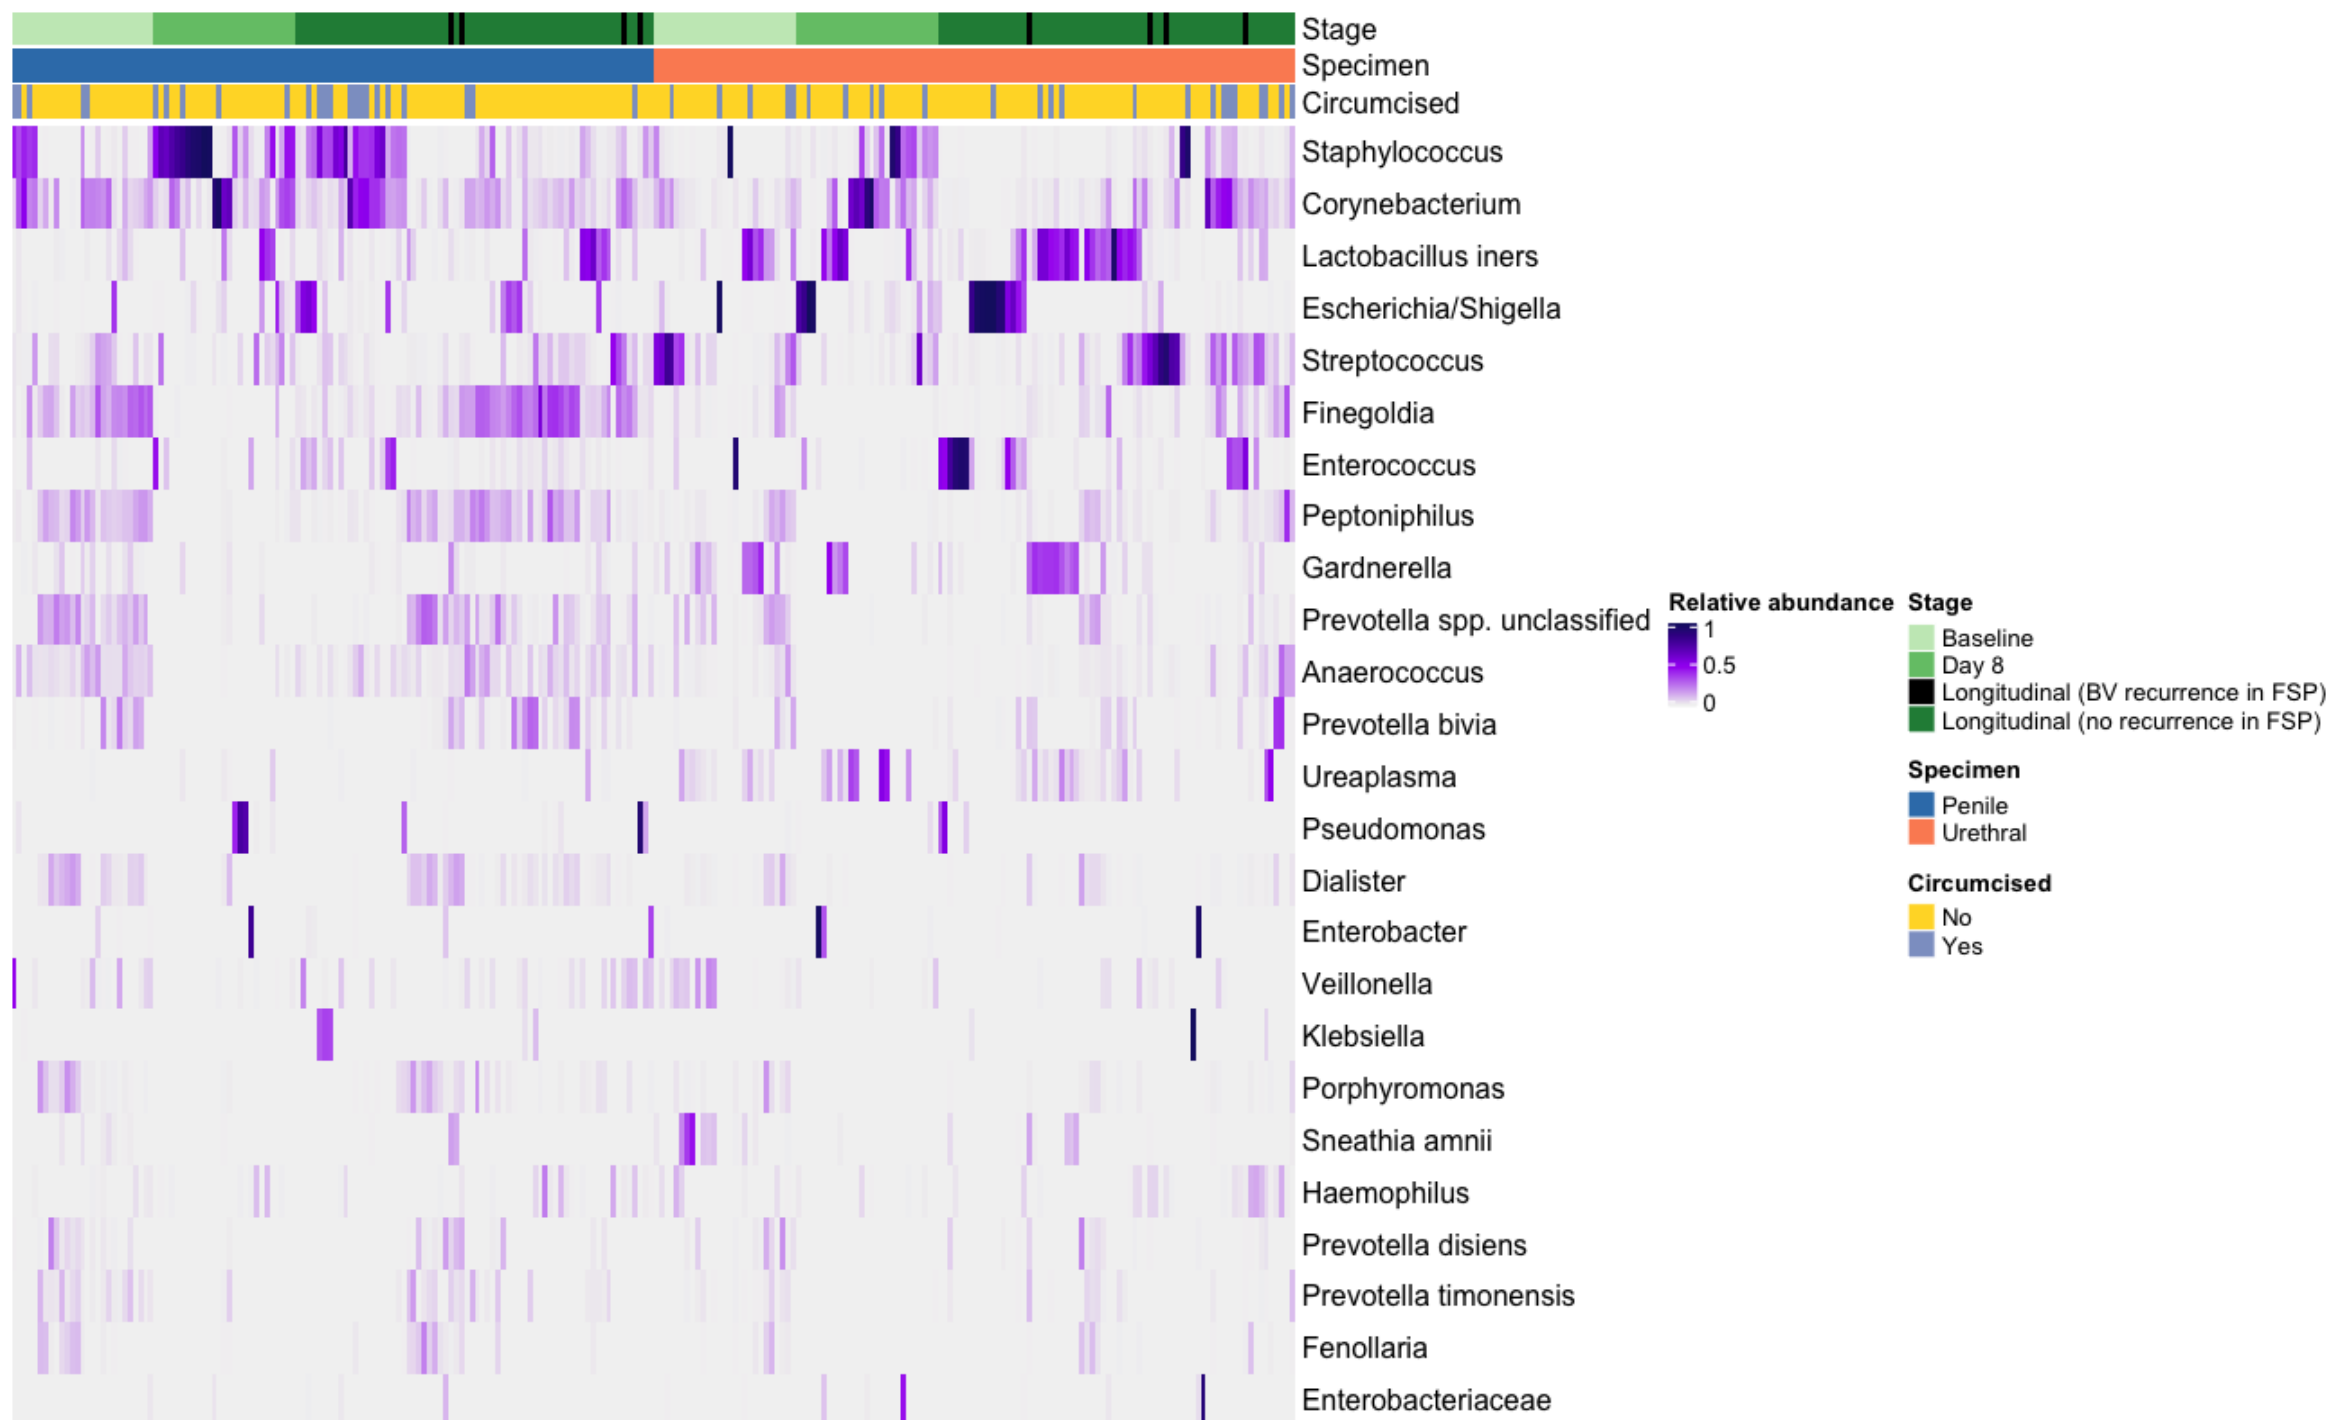

Supplement: mbio.02323-21-sf001.pdf [file mbio.02323-21-sf001.pdf]
