# Supplementary material for: A Prospective, Open-Label Pilot Study of Concurrent Male Partner Treatment for Bacterial Vaginosis
Source: PubMed Central journal article supplement (PMC8524345; doi:10.1128/mbio.02323-21), 2021-10-19

**A**

## Vaginal specimens

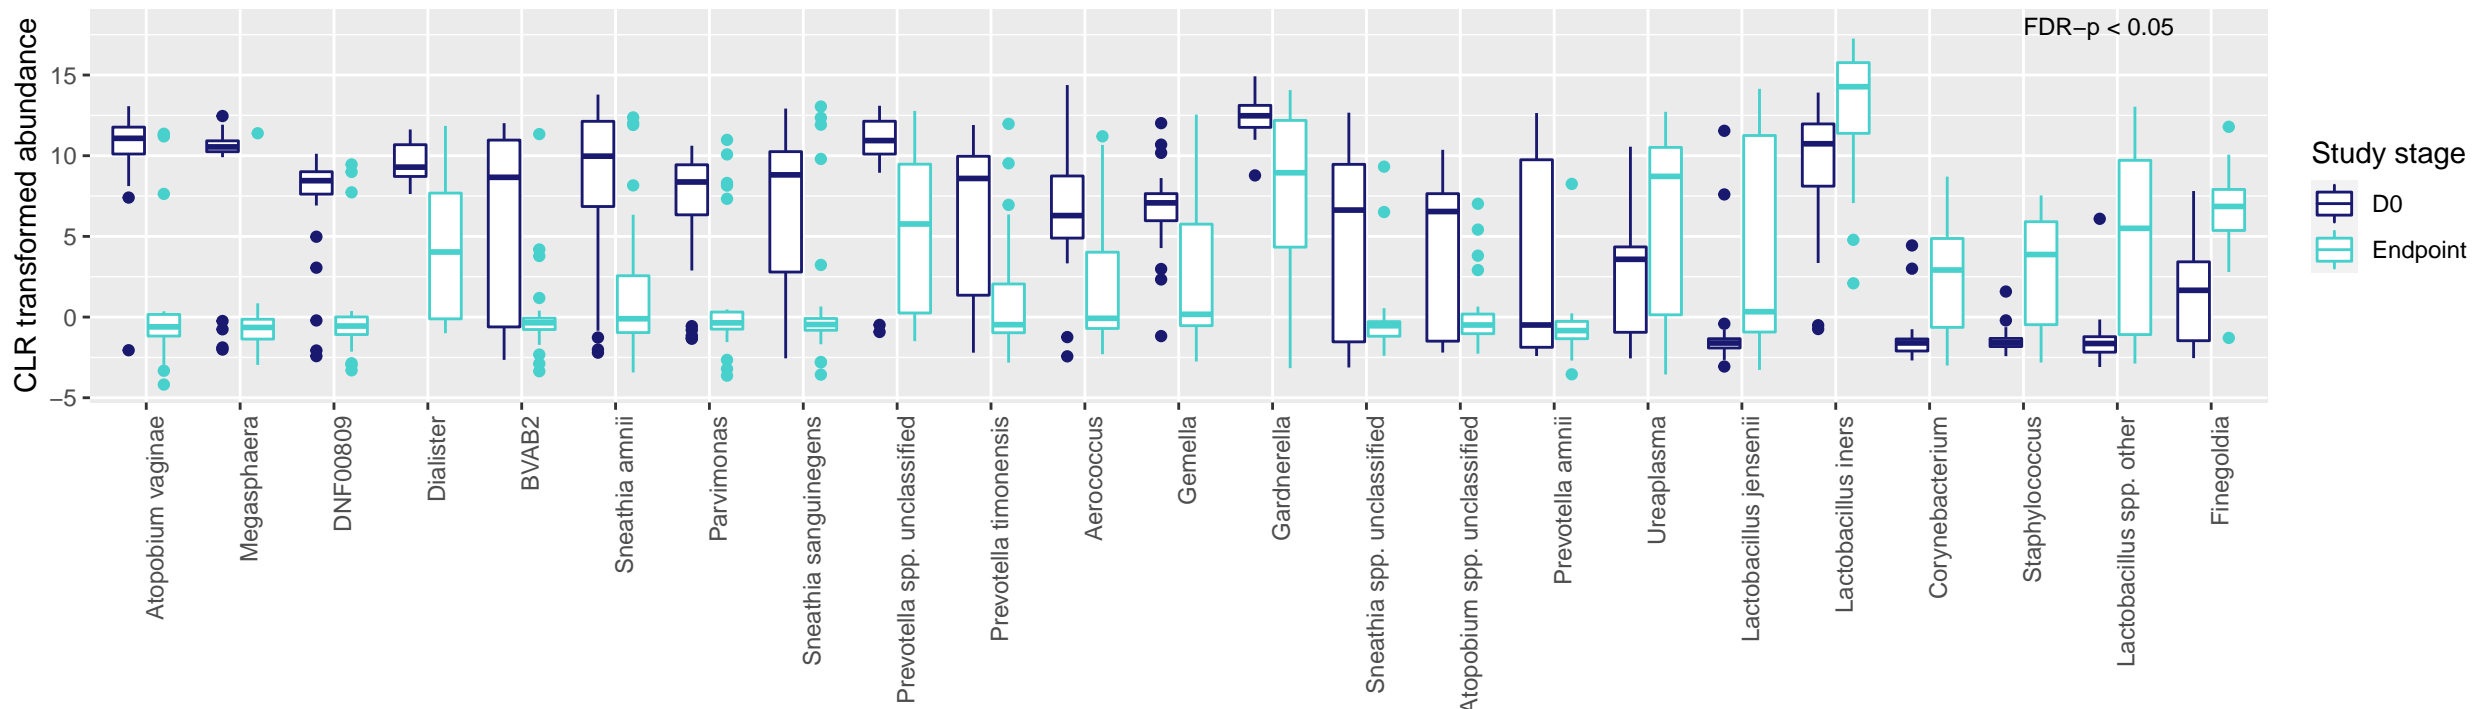**B**

## Cutaneous penile specimens

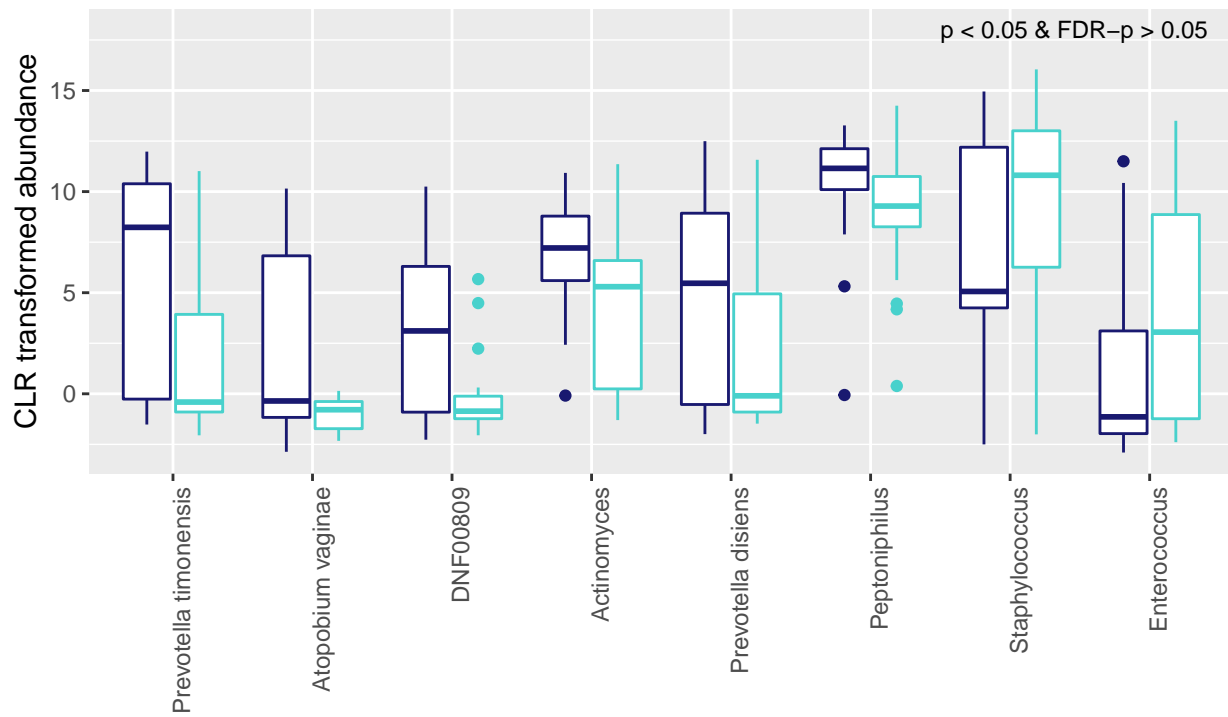**C**

## Urethral specimens

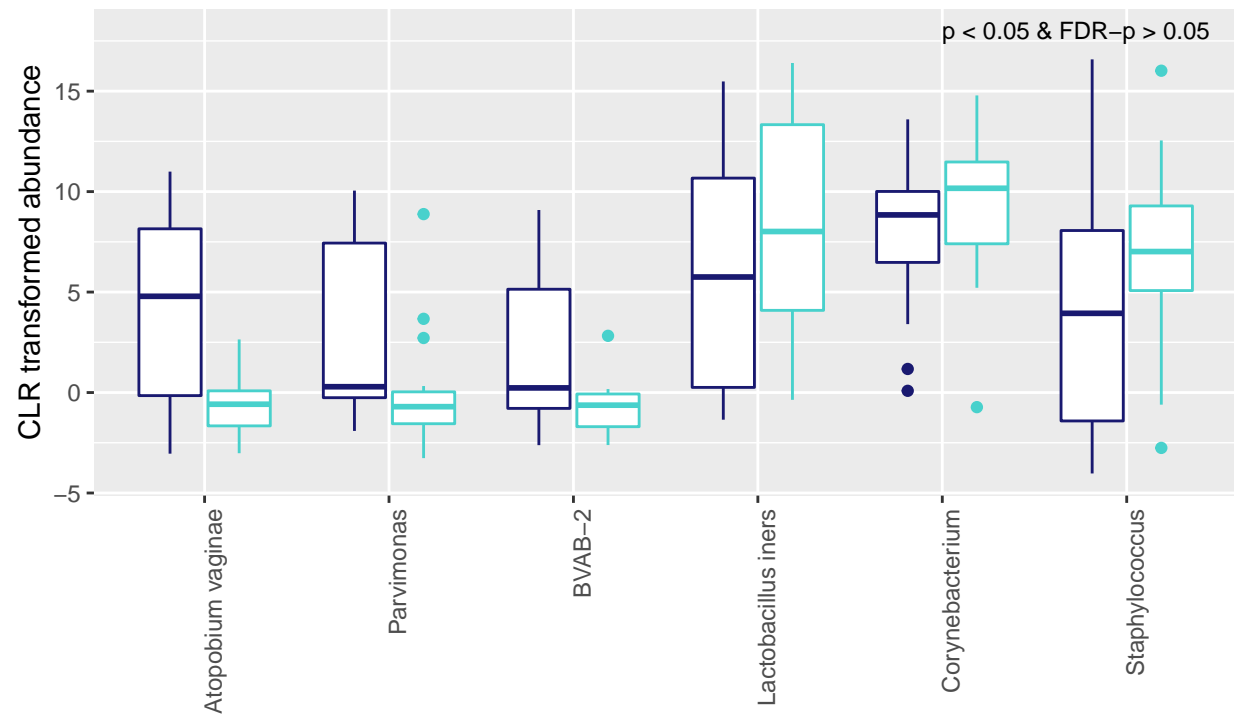

Supplement: mbio.02323-21-sf002.pdf [file mbio.02323-21-sf002.pdf]
