# Supplementary material for: A Prospective, Open-Label Pilot Study of Concurrent Male Partner Treatment for Bacterial Vaginosis
Source: PubMed Central journal article supplement (PMC8524345; doi:10.1128/mbio.02323-21), 2021-10-19
Supplement: mbio.02323-21-st001.pdf [file mbio.02323-21-st001.pdf]

Table S1. Taxa that are differentially abundant in vaginal samples in day-0 vs day-8 specimens and day-0 vs endpoint specimens (ALDEX2 analysis)

| Taxon <sup>a</sup>                        | Mean relative abundance at | Mean relative abundance at | Mean relative abundance at | Day 0 vs Day-8       |                    |                          | Day-0 vs Endpoint    |                    |                          |
|-------------------------------------------|----------------------------|----------------------------|----------------------------|----------------------|--------------------|--------------------------|----------------------|--------------------|--------------------------|
|                                           | Day 0 (%)                  | Day-8 (%)                  | Endpoint (%)               | p-value <sup>b</sup> | FDR-p <sup>c</sup> | Effect size <sup>d</sup> | p-value <sup>b</sup> | FDR-p <sup>c</sup> | Effect size <sup>d</sup> |
| <i>Atopobium vaginae</i> *#               | 7.37                       | 0.17                       | 0.69                       | 5.32E-07             | <b>1.18E-05</b>    | -1.59                    | 2.68E-07             | <b>1.23E-05</b>    | -1.82                    |
| <i>Megasphaera</i> *#                     | 5.33                       | 0.05                       | 0.27                       | 8.19E-06             | <b>7.13E-05</b>    | -1.54                    | 1.17E-06             | <b>2.95E-05</b>    | -1.82                    |
| <i>DNF00809</i> *#                        | 1.17                       | 0.07                       | 0.14                       | 6.98E-06             | <b>7.63E-05</b>    | -1.32                    | 6.26E-06             | <b>9.69E-05</b>    | -1.30                    |
| <i>Dialister</i> *#                       | 2.86                       | 0.34                       | 0.98                       | 1.74E-07             | <b>7.45E-06</b>    | -1.25                    | 1.56E-06             | <b>4.18E-05</b>    | -1.02                    |
| <i>Parvimonas</i> *#                      | 1.50                       | 0.06                       | 0.41                       | 4.88E-05             | <b>3.33E-04</b>    | -1.10                    | 2.96E-04             | <b>1.94E-03</b>    | -0.89                    |
| <i>Prevotella spp. unclassified</i> *#    | 8.48                       | 0.95                       | 1.92                       | 5.43E-06             | <b>6.28E-05</b>    | -1.09                    | 7.18E-05             | <b>6.62E-04</b>    | -0.79                    |
| <i>Gemella</i> *#                         | 0.89                       | 0.07                       | 0.82                       | 2.85E-05             | <b>2.24E-04</b>    | -1.01                    | 1.90E-04             | <b>1.39E-03</b>    | -0.72                    |
| <i>Peptoniphilus</i> *                    | 0.68                       | 0.22                       | 0.72                       | 6.77E-05             | <b>4.69E-04</b>    | -1.01                    | 2.24E-01             | 3.85E-01           | -0.24                    |
| <i>Anaerococcus</i> *                     | 0.40                       | 0.00                       | 0.57                       | 7.37E-04             | <b>2.84E-03</b>    | -0.86                    | 3.12E-01             | 4.69E-01           | 0.13                     |
| <i>Sneathia amnii</i> *#                  | 10.74                      | 0.89                       | 1.49                       | 2.07E-04             | <b>1.08E-03</b>    | -0.81                    | 6.87E-05             | <b>5.84E-04</b>    | -0.90                    |
| <i>Prevotella timonensis</i> *#           | 2.44                       | 0.09                       | 0.63                       | 1.59E-03             | <b>5.80E-03</b>    | -0.80                    | 4.79E-04             | <b>2.91E-03</b>    | -0.79                    |
| <i>BVAB-2</i> *#                          | 3.09                       | 0.68                       | 0.27                       | 1.59E-03             | <b>5.73E-03</b>    | -0.77                    | 2.42E-04             | <b>1.48E-03</b>    | -0.92                    |
| <i>Porphyromonas</i> *                    | 1.24                       | 0.05                       | 0.51                       | 3.37E-03             | <b>9.94E-03</b>    | -0.66                    | 2.20E-01             | 3.58E-01           | -0.27                    |
| <i>Gardnerella</i> *#                     | 20.32                      | 7.91                       | 7.79                       | 3.28E-04             | <b>1.85E-03</b>    | -0.64                    | 3.70E-05             | <b>4.35E-04</b>    | -0.67                    |
| <i>Sneathia sanguinegens</i> *#           | 4.36                       | 1.56                       | 1.72                       | 1.96E-03             | <b>7.12E-03</b>    | -0.62                    | 8.60E-04             | <b>4.75E-03</b>    | -0.80                    |
| <i>Prevotella disiens</i> *               | 0.82                       | 0.04                       | 0.69                       | 4.49E-03             | <b>1.26E-02</b>    | -0.61                    | 3.44E-01             | 4.99E-01           | -0.22                    |
| <i>Atopobium spp. unclassified</i> *#     | 0.54                       | 0.04                       | 0.04                       | 1.24E-02             | <b>2.89E-02</b>    | -0.57                    | 1.39E-02             | <b>4.38E-02</b>    | -0.64                    |
| <i>Sneathia spp. unclassified</i> #       | 2.79                       | 0.33                       | 0.12                       | 3.86E-02             | 7.47E-02           | -0.45                    | 2.92E-03             | <b>1.26E-02</b>    | -0.66                    |
| <i>Aerococcus</i> *#                      | 2.53                       | 0.93                       | 0.41                       | 1.26E-02             | <b>3.31E-02</b>    | -0.45                    | 1.72E-04             | <b>1.23E-03</b>    | -0.77                    |
| <i>Mageeibacillus indolicus (BVAB-3)</i>  | 0.28                       | 0.00                       | 0.00                       | 1.26E-01             | 1.84E-01           | -0.34                    | 3.56E-02             | 8.90E-02           | -0.46                    |
| <i>Prevotella amnii</i> #                 | 2.71                       | 0.02                       | 0.03                       | 6.00E-02             | 1.05E-01           | -0.32                    | 1.61E-02             | <b>5.00E-02</b>    | -0.43                    |
| <i>Finegoldia</i> #                       | 0.09                       | 0.04                       | 1.02                       | 5.71E-01             | 6.31E-01           | -0.09                    | 3.06E-06             | <b>5.64E-05</b>    | 1.11                     |
| <i>Lactobacillus jensenii</i> #           | 0.21                       | 3.29                       | 4.09                       | 9.61E-02             | 1.38E-01           | 0.21                     | 4.87E-03             | <b>1.80E-02</b>    | 0.58                     |
| <i>Lactobacillus gasseri</i>              | 0.02                       | 6.26                       | 2.34                       | 4.86E-02             | 7.87E-02           | 0.26                     | 6.73E-02             | 1.37E-01           | 0.28                     |
| <i>Haemophilus</i> *                      | 0.00                       | 0.13                       | 0.04                       | 2.41E-02             | <b>4.94E-02</b>    | 0.43                     | 1.50E-01             | 2.48E-01           | 0.32                     |
| <i>Enterococcus</i> *                     | 0.00                       | 3.59                       | 0.00                       | 1.64E-02             | <b>3.48E-02</b>    | 0.45                     | 5.28E-01             | 6.33E-01           | 0.06                     |
| <i>Streptococcus</i> *                    | 0.06                       | 2.13                       | 0.20                       | 1.23E-02             | <b>2.89E-02</b>    | 0.55                     | 1.89E-02             | 5.16E-02           | 0.55                     |
| <i>Lactobacillus iners</i> *#             | 8.41                       | 57.20                      | 49.25                      | 3.48E-04             | <b>1.93E-03</b>    | 0.71                     | 2.42E-04             | <b>1.73E-03</b>    | 0.59                     |
| <i>Escherichia/Shigella</i> *             | 0.00                       | 1.06                       | 0.01                       | 8.32E-04             | <b>3.21E-03</b>    | 0.75                     | 1.95E-01             | 2.97E-01           | 0.28                     |
| <i>Lactobacillus spp. unclassified</i> *# | 0.01                       | 0.07                       | 2.13                       | 1.48E-03             | <b>3.99E-03</b>    | 0.79                     | 9.75E-05             | <b>7.07E-04</b>    | 0.99                     |
| <i>Staphylococcus</i> *#                  | 0.00                       | 0.40                       | 0.08                       | 3.97E-04             | <b>1.75E-03</b>    | 0.86                     | 4.93E-04             | <b>2.79E-03</b>    | 0.92                     |
| <i>Ureaplasma</i> *#                      | 0.19                       | 3.78                       | 1.35                       | 1.33E-05             | <b>1.23E-04</b>    | 0.92                     | 8.25E-03             | <b>2.84E-02</b>    | 0.54                     |
| <i>Corynebacterium</i> *#                 | 0.00                       | 0.72                       | 0.14                       | 2.36E-05             | <b>1.91E-04</b>    | 1.11                     | 4.22E-03             | <b>1.51E-02</b>    | 0.68                     |

<sup>a</sup>Only those taxa with a p-value<0.05 for either the Day-0 vs Day-8 or Day-0 vs Endpoint comparison are shown in this table. \* FDR-p<0.05 for Day-0 vs Day-8 comparison; # FDR-p<0.05 for Day-0 vs Endpoint comparison

<sup>b</sup>Expected P value of Wilcoxon rank test

<sup>c</sup>Expected Benjamini-Hochberg corrected P value of Wilcoxon test. Bold indicates statistically significant difference at FDR-p<0.05

<sup>d</sup>Median difference in CLR transformed abundance between Day-0 vs Day-8 groups /median of the largest difference in CLR transformed abundance within Day-0 and Day-8 groups

<sup>e</sup>Expected P value of Wilcoxon rank test

<sup>f</sup>Expected Benjamini-Hochberg corrected P value of Wilcoxon test. Bold indicates statistically significant difference at FDR-p<0.05

<sup>g</sup>Median difference in CLR transformed abundance between Day-0 vs Endpoint groups /median of the largest difference in CLR transformed abundance within Day-0 and Endpoint groups
