# Supplementary material for: A Prospective, Open-Label Pilot Study of Concurrent Male Partner Treatment for Bacterial Vaginosis
Source: PubMed Central journal article supplement (PMC8524345; doi:10.1128/mbio.02323-21), 2021-10-19
Supplement: mbio.02323-21-st002.pdf [file mbio.02323-21-st002.pdf]

Table S2. Taxa that are differentially abundant in cutaneous penile samples in day-0 vs day-8 specimens and day-0 vs endpoint specimens (ALDEX2 analysis)

| Taxon <sup>a</sup>                   | Mean relative abundance at Day 0 (%) | Mean relative abundance at Day-8 (%) | Mean relative abundance at Endpoint (%) | Day 0 vs Day-8       |                    |                          | Day-0 vs Endpoint    |                    |                          |
|--------------------------------------|--------------------------------------|--------------------------------------|-----------------------------------------|----------------------|--------------------|--------------------------|----------------------|--------------------|--------------------------|
|                                      |                                      |                                      |                                         | p-value <sup>b</sup> | FDR-p <sup>c</sup> | Effect size <sup>d</sup> | p-value <sup>e</sup> | FDR-p <sup>f</sup> | Effect size <sup>g</sup> |
| <i>Anaerococcus</i> *                | 5.53                                 | 0.15                                 | 3.70                                    | 1.49E-08             | <b>2.02E-06</b>    | -2.32                    | 8.41E-02             | 4.04E-01           | -0.23                    |
| <i>Peptoniphilus</i> *               | 8.42                                 | 0.17                                 | 5.38                                    | 4.00E-07             | <b>1.92E-05</b>    | -1.65                    | 1.60E-02             | 1.89E-01           | -0.35                    |
| <i>Finegoldia</i> *                  | 13.39                                | 0.45                                 | 11.83                                   | 1.42E-06             | <b>5.38E-05</b>    | -1.66                    | 4.35E-01             | 7.65E-01           | -0.12                    |
| <i>Prevotella</i> spp. unclassified* | 8.01                                 | 0.20                                 | 3.53                                    | 1.18E-05             | <b>2.95E-04</b>    | -1.20                    | 5.40E-02             | 3.26E-01           | -0.26                    |
| <i>Dialister</i> *                   | 4.01                                 | 0.38                                 | 1.99                                    | 1.87E-04             | <b>2.09E-03</b>    | -0.91                    | 1.09E-01             | 4.24E-01           | -0.27                    |
| <i>Staphylococcus</i> *              | 8.86                                 | 41.43                                | 12.89                                   | 2.19E-04             | <b>3.36E-03</b>    | 0.84                     | 1.27E-02             | 1.83E-01           | 0.34                     |
| <i>Prevotella timonensis</i> *       | 2.34                                 | 0.23                                 | 0.91                                    | 4.13E-04             | <b>3.96E-03</b>    | -0.86                    | 4.37E-03             | 1.07E-01           | -0.64                    |
| <i>Porphyromonas</i> *               | 2.97                                 | 0.03                                 | 1.46                                    | 4.25E-04             | <b>4.19E-03</b>    | -0.81                    | 3.41E-01             | 6.45E-01           | -0.15                    |
| <i>Campylobacter</i> *               | 1.26                                 | 0.01                                 | 0.92                                    | 1.11E-03             | <b>8.27E-03</b>    | -0.77                    | 3.78E-01             | 7.01E-01           | -0.19                    |
| <i>Actinomyces</i> *                 | 0.91                                 | 0.32                                 | 0.48                                    | 8.33E-04             | <b>8.69E-03</b>    | -0.77                    | 1.03E-02             | 1.69E-01           | -0.41                    |
| <i>Prevotella disiens</i> *          | 1.87                                 | 0.02                                 | 1.33                                    | 2.85E-03             | <b>1.67E-02</b>    | -0.72                    | 2.56E-02             | 2.16E-01           | -0.40                    |
| <i>Peptostreptococcus</i> *          | 0.64                                 | 0.00                                 | 0.38                                    | 1.44E-02             | <b>4.96E-02</b>    | -0.59                    | 1.75E-01             | 5.07E-01           | -0.25                    |
| <i>Negativicoccus</i>                | 0.89                                 | 0.00                                 | 0.13                                    | 1.34E-02             | 5.02E-02           | -0.54                    | 6.11E-02             | 3.19E-01           | -0.42                    |
| <i>Escherichia/Shigella</i>          | 1.47                                 | 3.05                                 | 5.82                                    | 1.31E-02             | 5.30E-02           | 0.49                     | 7.79E-01             | 9.17E-01           | 0.01                     |
| <i>DNF00809</i>                      | 0.24                                 | 0.00                                 | 0.01                                    | 1.71E-02             | 5.51E-02           | -0.58                    | 1.18E-02             | 1.50E-01           | -0.58                    |
| <i>Prevotella bivia</i>              | 3.28                                 | 0.00                                 | 1.99                                    | 1.56E-02             | 6.12E-02           | -0.56                    | 7.25E-01             | 8.95E-01           | -0.02                    |
| <i>Howardella</i>                    | 0.08                                 | 0.00                                 | 0.03                                    | 3.43E-02             | 8.68E-02           | -0.53                    | 5.64E-02             | 2.86E-01           | -0.35                    |
| <i>Varibaculum</i>                   | 0.08                                 | 0.00                                 | 0.09                                    | 3.64E-02             | 9.33E-02           | -0.48                    | 1.25E-01             | 4.02E-01           | -0.29                    |
| <i>Pseudomonas</i>                   | 0.07                                 | 7.01                                 | 3.95                                    | 3.71E-02             | 9.62E-02           | 0.36                     | 1.65E-01             | 4.36E-01           | 0.23                     |
| <i>Fenollaria</i>                    | 1.85                                 | 0.02                                 | 0.72                                    | 3.99E-02             | 1.02E-01           | -0.38                    | 4.22E-01             | 7.03E-01           | -0.11                    |
| <i>Atopobium vaginae</i>             | 0.61                                 | 0.02                                 | 0.00                                    | 9.03E-02             | 1.85E-01           | -0.40                    | 9.62E-03             | 1.33E-01           | -0.60                    |
| <i>Enterococcus</i>                  | 0.54                                 | 2.65                                 | 2.17                                    | 1.06E-01             | 1.96E-01           | 0.25                     | 4.89E-02             | 2.86E-01           | 0.35                     |

<sup>a</sup>Only those taxa with a p-value <0.05 for either the Day-0 vs Day-8 or Day-0 vs Endpoint comparison are shown in this table. \* FDR-p<0.05 for Day-0 vs Day-8 comparison

<sup>b</sup>Expected P value of Wilcoxon rank test

<sup>c</sup>Expected Benjamini-Hochberg corrected P value of Wilcoxon test. Bold indicates statistically significant difference at FDR-p<0.05

<sup>d</sup>Median difference in CLR transformed abundance between Day-0 vs Day-8 groups /median of the largest difference in CLR transformed abundance within Day-0 and Day-8 groups

<sup>e</sup>Expected P value of Wilcoxon rank test

<sup>f</sup>Expected Benjamini-Hochberg corrected P value of Wilcoxon test. Bold indicates statistically significant difference at FDR-p<0.05

<sup>g</sup>Median difference in CLR transformed abundance between Day-0 vs Endpoint groups /median of the largest difference in CLR transformed abundance within Day-0 and
