# Supplementary material for: A Prospective, Open-Label Pilot Study of Concurrent Male Partner Treatment for Bacterial Vaginosis
Source: PubMed Central journal article supplement (PMC8524345; doi:10.1128/mbio.02323-21), 2021-10-19
Supplement: mbio.02323-21-st003.pdf [file mbio.02323-21-st003.pdf]

Table S3. Taxa that are differentially abundant in urethral samples in day-0 vs day-8 specimens and day-0 vs endpoint specimens (ALDEX2 analysis)

| Taxon <sup>a</sup>                   | Mean relative abundance at Day 0 (%) | Mean relative abundance at Day-8 (%) | Mean relative abundance at Endpoint (%) | Day 0 vs Day-8       |                    |                          | Day-0 vs Endpoint    |                    |                          |
|--------------------------------------|--------------------------------------|--------------------------------------|-----------------------------------------|----------------------|--------------------|--------------------------|----------------------|--------------------|--------------------------|
|                                      |                                      |                                      |                                         | p-value <sup>b</sup> | FDR-p <sup>c</sup> | Effect size <sup>d</sup> | p-value <sup>e</sup> | FDR-p <sup>f</sup> | Effect size <sup>g</sup> |
| <i>Anaerococcus</i> *                | 1.47                                 | 0.00                                 | 2.88                                    | 1.49E-04             | <b>2.82E-03</b>    | -1.05                    | 3.15E-01             | 7.00E-01           | 0.21                     |
| <i>Finegoldia</i> *                  | 1.86                                 | 0.04                                 | 4.55                                    | 1.60E-04             | <b>3.19E-03</b>    | -1.00                    | 2.09E-01             | 6.32E-01           | 0.31                     |
| <i>Peptoniphilus</i> *               | 2.42                                 | 0.04                                 | 3.62                                    | 2.41E-04             | <b>4.36E-03</b>    | -1.00                    | 6.40E-01             | 8.72E-01           | 0.11                     |
| <i>Prevotella</i> spp. unclassified* | 3.89                                 | 0.04                                 | 1.33                                    | 9.12E-04             | <b>1.10E-02</b>    | -0.79                    | 1.16E-01             | 4.96E-01           | -0.25                    |
| <i>Dialister</i> *                   | 1.31                                 | 0.03                                 | 0.67                                    | 1.17E-03             | <b>1.21E-02</b>    | -0.79                    | 1.64E-01             | 5.42E-01           | -0.18                    |
| <i>Escherichia/Shigella</i> *        | 4.10                                 | 14.87                                | 3.79                                    | 3.89E-03             | <b>2.90E-02</b>    | 0.50                     | 6.03E-01             | 8.59E-01           | 0.08                     |
| <i>Staphylococcus</i> *              | 4.77                                 | 15.28                                | 4.60                                    | 1.64E-03             | <b>1.81E-02</b>    | 0.65                     | 1.76E-03             | 7.92E-02           | 0.37                     |
| <i>Porphyromonas</i>                 | 1.22                                 | 0.00                                 | 0.27                                    | 1.76E-02             | 6.41E-02           | -0.55                    | 4.09E-01             | 7.34E-01           | -0.12                    |
| <i>Campylobacter</i>                 | 0.41                                 | 0.00                                 | 0.28                                    | 1.86E-02             | 6.64E-02           | -0.55                    | 5.44E-01             | 8.11E-01           | -0.07                    |
| <i>Rothia</i>                        | 0.22                                 | 0.31                                 | 0.01                                    | 2.55E-02             | 7.49E-02           | 0.44                     | 6.21E-01             | 8.49E-01           | 0.08                     |
| <i>Atopobium vaginae</i>             | 0.65                                 | 0.17                                 | 0.00                                    | 2.28E-02             | 7.67E-02           | -0.54                    | 2.68E-03             | 6.98E-02           | -0.69                    |
| <i>Streptococcus</i>                 | 15.86                                | 3.94                                 | 17.70                                   | 3.35E-02             | 1.11E-01           | -0.32                    | 5.34E-01             | 8.34E-01           | 0.10                     |
| <i>Veillonella</i>                   | 3.23                                 | 0.39                                 | 0.51                                    | 3.22E-02             | 9.91E-02           | -0.46                    | 1.22E-01             | 5.14E-01           | -0.33                    |
| <i>Gardnerella</i>                   | 7.51                                 | 4.68                                 | 6.02                                    | 1.86E-02             | 7.30E-02           | -0.46                    | 4.81E-01             | 7.99E-01           | -0.16                    |
| <i>Prevotella disiens</i>            | 1.75                                 | 0.00                                 | 0.50                                    | 2.15E-02             | 7.22E-02           | -0.51                    | 3.48E-01             | 6.86E-01           | -0.13                    |
| <i>Prevotella timonensis</i>         | 0.59                                 | 0.01                                 | 0.76                                    | 1.35E-02             | 5.30E-02           | -0.61                    | 3.05E-01             | 6.65E-01           | -0.19                    |
| <i>Sneathia amnii</i>                | 4.90                                 | 0.03                                 | 0.83                                    | 3.48E-02             | 1.02E-01           | -0.41                    | 1.42E-01             | 5.15E-01           | -0.34                    |
| <i>Sneathia sanguinegens</i>         | 4.54                                 | 0.00                                 | 0.31                                    | 2.35E-02             | 7.81E-02           | -0.45                    | 7.00E-02             | 3.90E-01           | -0.35                    |
| <i>BVAB-2</i>                        | 0.32                                 | 0.00                                 | 0.00                                    | 1.40E-01             | 2.42E-01           | -0.28                    | 3.99E-02             | 2.70E-01           | -0.42                    |
| <i>Lactobacillus iners</i>           | 8.96                                 | 10.78                                | 18.02                                   | 1.93E-01             | 3.31E-01           | 0.13                     | 3.21E-02             | 3.06E-01           | 0.25                     |
| <i>Corynebacterium</i>               | 3.69                                 | 21.37                                | 7.59                                    | 2.80E-01             | 4.31E-01           | 0.31                     | 3.25E-02             | 3.26E-01           | 0.26                     |
| <i>Parvimonas</i>                    | 0.95                                 | 0.06                                 | 0.06                                    | 5.91E-02             | 1.41E-01           | -0.43                    | 3.56E-02             | 2.82E-01           | -0.46                    |

<sup>a</sup>Only those taxa with a p-value <0.05 for either the Day-0 vs Day-8 or Day-0 vs Endpoint comparison are shown in this table. \* FDR-p<0.05 for Day-0 vs Day-8 comparison

<sup>b</sup>Expected P value of Wilcoxon rank test

<sup>c</sup>Expected Benjamini-Hochberg corrected P value of Wilcoxon test. Bold indicates statistically significant difference at FDR-p<0.05

<sup>d</sup>Median difference in CLR transformed abundance between Day-0 vs Day-8 groups /median of the largest difference in CLR transformed abundance within Day-0 and Day-8 groups

<sup>e</sup>Expected P value of Wilcoxon rank test

<sup>f</sup>Expected Benjamini-Hochberg corrected P value of Wilcoxon test. Bold indicates statistically significant difference at FDR-p<0.05

<sup>g</sup>Median difference in CLR transformed abundance between Day-0 vs Endpoint groups /median of the largest difference in CLR transformed abundance within Day-0 and Endpoint groups
