# Supplementary material for: A Prospective, Open-Label Pilot Study of Concurrent Male Partner Treatment for Bacterial Vaginosis
Source: PubMed Central journal article supplement (PMC8524345; doi:10.1128/mbio.02323-21), 2021-10-19
Supplement: mbio.02323-21-st004.pdf [file mbio.02323-21-st004.pdf]

Table S4. Analysis of Composition of Microbiomes (ANCOM) of longitudinal vaginal, cutaneous penile and urethral specimens from couples that were cured vs couples who recurred<sup>a</sup>

| Taxon                               | CLR-mean difference <sup>b</sup> | W-statistic <sup>c</sup> | Detected_0.9 <sup>d</sup> | Detected_0.8 <sup>e</sup> | Detected_0.7 <sup>f</sup> | Detected_0.6 <sup>g</sup> |
|-------------------------------------|----------------------------------|--------------------------|---------------------------|---------------------------|---------------------------|---------------------------|
| <i>Atopobium</i>                    | 0.14                             | Inf                      | TRUE                      | TRUE                      | TRUE                      | TRUE                      |
| <i>Ezakiella</i>                    | 0.24                             | Inf                      | TRUE                      | TRUE                      | TRUE                      | TRUE                      |
| <i>Flavobacterium</i>               | 0.17                             | Inf                      | TRUE                      | TRUE                      | TRUE                      | TRUE                      |
| <i>Fusobacterium</i>                | 0.00                             | Inf                      | TRUE                      | TRUE                      | TRUE                      | TRUE                      |
| <i>Murdochella</i>                  | 0.20                             | Inf                      | TRUE                      | TRUE                      | TRUE                      | TRUE                      |
| <i>Rothia</i>                       | 0.15                             | Inf                      | TRUE                      | TRUE                      | TRUE                      | TRUE                      |
| <i>Lactobacillus antri</i>          | -0.09                            | Inf                      | TRUE                      | TRUE                      | TRUE                      | TRUE                      |
| <i>Lactobacillus coleohominis</i>   | -0.07                            | Inf                      | TRUE                      | TRUE                      | TRUE                      | TRUE                      |
| <i>Lactobacillus crispatus</i>      | -0.76                            | Inf                      | TRUE                      | TRUE                      | TRUE                      | TRUE                      |
| <i>Lactobacillus gasseri</i>        | -0.45                            | Inf                      | TRUE                      | TRUE                      | TRUE                      | TRUE                      |
| <b><i>Sneathia sanguinegens</i></b> | <b>1.08</b>                      | <b>40</b>                | <b>TRUE</b>               | <b>TRUE</b>               | <b>TRUE</b>               | <b>TRUE</b>               |
| <b><i>Corynebacterium</i></b>       | <b>0.31</b>                      | <b>33</b>                | FALSE                     | FALSE                     | <b>TRUE</b>               | <b>TRUE</b>               |
| <b><i>Dialister</i></b>             | <b>0.52</b>                      | <b>31</b>                | FALSE                     | FALSE                     | <b>TRUE</b>               | <b>TRUE</b>               |
| <b><i>Gemella</i></b>               | <b>0.84</b>                      | <b>31</b>                | FALSE                     | FALSE                     | <b>TRUE</b>               | <b>TRUE</b>               |
| <b><i>Sneathia amnii</i></b>        | <b>1.20</b>                      | <b>31</b>                | FALSE                     | FALSE                     | <b>TRUE</b>               | <b>TRUE</b>               |
| <i>Parvimonas</i>                   | 0.12                             | 30                       | FALSE                     | FALSE                     | FALSE                     | TRUE                      |
| <i>Peptostreptococcus</i>           | 0.02                             | 28                       | FALSE                     | FALSE                     | FALSE                     | TRUE                      |
| <i>Atopobium vaginae</i>            | 0.29                             | 23                       | FALSE                     | FALSE                     | FALSE                     | FALSE                     |
| <i>Muribaculaceae</i>               | 0.23                             | 12                       | FALSE                     | FALSE                     | FALSE                     | FALSE                     |
| <i>Actinomyces</i>                  | -0.84                            | 7                        | FALSE                     | FALSE                     | FALSE                     | FALSE                     |
| <i>Aerococcus</i>                   | 0.34                             | 2                        | FALSE                     | FALSE                     | FALSE                     | FALSE                     |
| <i>Alloprevotella</i>               | -0.07                            | 6                        | FALSE                     | FALSE                     | FALSE                     | FALSE                     |
| <i>Anaerococcus</i>                 | -0.25                            | 1                        | FALSE                     | FALSE                     | FALSE                     | FALSE                     |
| <i>Bifidobacterium</i>              | -0.71                            | 7                        | FALSE                     | FALSE                     | FALSE                     | FALSE                     |
| <i>Campylobacter</i>                | -0.33                            | 12                       | FALSE                     | FALSE                     | FALSE                     | FALSE                     |
| <i>Enterococcus</i>                 | -0.47                            | 7                        | FALSE                     | FALSE                     | FALSE                     | FALSE                     |
| <i>Escherichia/Shigella</i>         | 0.04                             | 1                        | FALSE                     | FALSE                     | FALSE                     | FALSE                     |
| <i>Fenollaria</i>                   | -0.64                            | 13                       | FALSE                     | FALSE                     | FALSE                     | FALSE                     |
| <i>Fingoldia</i>                    | -1.00                            | 15                       | FALSE                     | FALSE                     | FALSE                     | FALSE                     |
| <i>Granulicatella</i>               | -0.11                            | 8                        | FALSE                     | FALSE                     | FALSE                     | FALSE                     |
| <i>Haemophilus</i>                  | 0.48                             | 7                        | FALSE                     | FALSE                     | FALSE                     | FALSE                     |
| <i>Howardella</i>                   | -0.47                            | 14                       | FALSE                     | FALSE                     | FALSE                     | FALSE                     |
| <i>Lactobacillus</i>                | 0.04                             | 25                       | FALSE                     | FALSE                     | FALSE                     | FALSE                     |
| <i>Lawsonella</i>                   | 0.21                             | 8                        | FALSE                     | FALSE                     | FALSE                     | FALSE                     |
| <i>Mobiluncus</i>                   | -0.07                            | 7                        | FALSE                     | FALSE                     | FALSE                     | FALSE                     |
| <i>Mycoplasma</i>                   | 0.52                             | 3                        | FALSE                     | FALSE                     | FALSE                     | FALSE                     |
| <i>Neisseria</i>                    | -0.18                            | 6                        | FALSE                     | FALSE                     | FALSE                     | FALSE                     |
| <i>Peptococcus</i>                  | -0.47                            | 6                        | FALSE                     | FALSE                     | FALSE                     | FALSE                     |
| <i>Peptoniphilus</i>                | 0.25                             | 3                        | FALSE                     | FALSE                     | FALSE                     | FALSE                     |
| <i>Porphyromonas</i>                | -0.12                            | 6                        | FALSE                     | FALSE                     | FALSE                     | FALSE                     |
| <i>Prevotella</i> spp. unclassified | 0.13                             | 7                        | FALSE                     | FALSE                     | FALSE                     | FALSE                     |
| <i>Solobacterium</i>                | -0.32                            | 11                       | FALSE                     | FALSE                     | FALSE                     | FALSE                     |
| <i>Staphylococcus</i>               | 0.78                             | 16                       | FALSE                     | FALSE                     | FALSE                     | FALSE                     |
| <i>Streptococcus</i>                | -0.15                            | 7                        | FALSE                     | FALSE                     | FALSE                     | FALSE                     |
| <i>Sutterella</i>                   | 0.34                             | 12                       | FALSE                     | FALSE                     | FALSE                     | FALSE                     |
| <i>Ureaplasma</i>                   | -1.61                            | 1                        | FALSE                     | FALSE                     | FALSE                     | FALSE                     |
| <i>Veillonella</i>                  | 0.28                             | 8                        | FALSE                     | FALSE                     | FALSE                     | FALSE                     |
| <i>Gardnerella</i>                  | 1.73                             | 0                        | FALSE                     | FALSE                     | FALSE                     | FALSE                     |
| <i>Lactobacillus iners</i>          | -2.70                            | 1                        | FALSE                     | FALSE                     | FALSE                     | FALSE                     |
| <i>Lactobacillus jensenii</i>       | -0.95                            | 4                        | FALSE                     | FALSE                     | FALSE                     | FALSE                     |
| <i>Prevotella bivia</i>             | 1.05                             | 18                       | FALSE                     | FALSE                     | FALSE                     | FALSE                     |
| <i>Prevotella disiens</i>           | 0.68                             | 8                        | FALSE                     | FALSE                     | FALSE                     | FALSE                     |
| <i>Prevotella melaninogenica</i>    | 0.05                             | 8                        | FALSE                     | FALSE                     | FALSE                     | FALSE                     |
| <i>Prevotella timonensis</i>        | 0.41                             | 1                        | FALSE                     | FALSE                     | FALSE                     | FALSE                     |
| <i>Alloscardovia</i>                | 0.09                             | Inf                      | TRUE                      | TRUE                      | TRUE                      | TRUE                      |
| <i>Arcanobacterium</i>              | 0.22                             | Inf                      | TRUE                      | TRUE                      | TRUE                      | TRUE                      |
| <i>Ezakiella</i>                    | 0.16                             | Inf                      | TRUE                      | TRUE                      | TRUE                      | TRUE                      |
| <i>Fusobacterium</i>                | 0.25                             | Inf                      | TRUE                      | TRUE                      | TRUE                      | TRUE                      |
| <i>Mycoplasma</i>                   | -0.17                            | Inf                      | TRUE                      | TRUE                      | TRUE                      | TRUE                      |
| <i>Pseudomonas</i>                  | -0.05                            | Inf                      | TRUE                      | TRUE                      | TRUE                      | TRUE                      |
| <i>Lactobacillus gasseri</i>        | 0.26                             | Inf                      | TRUE                      | TRUE                      | TRUE                      | TRUE                      |
| <i>Streptococcus</i>                | 1.22                             | 0                        | FALSE                     | FALSE                     | FALSE                     | FALSE                     |

Vaginal microbiota

Table S4. Analysis of Composition of Microbiomes (ANCOM) of longitudinal vaginal, cutaneous penile and urethral specimens from couples that were cured vs couples who recurred<sup>a</sup>

|                                     |                                     |       |       |       |       |       |       |
|-------------------------------------|-------------------------------------|-------|-------|-------|-------|-------|-------|
| Cutaneous penile microbiota         | <i>Enterococcus</i>                 | 1.39  | 0     | FALSE | FALSE | FALSE | FALSE |
|                                     | <i>Gardnerella</i>                  | 1.12  | 0     | FALSE | FALSE | FALSE | FALSE |
|                                     | <i>Corynebacterium</i>              | 0.19  | 0     | FALSE | FALSE | FALSE | FALSE |
|                                     | <i>Gemella</i>                      | 1.22  | 0     | FALSE | FALSE | FALSE | FALSE |
|                                     | <i>Sneathia amnii</i>               | 1.07  | 0     | FALSE | FALSE | FALSE | FALSE |
|                                     | <i>Prevotella bivia</i>             | 0.64  | 0     | FALSE | FALSE | FALSE | FALSE |
|                                     | <i>Prevotella timonensis</i>        | 0.76  | 0     | FALSE | FALSE | FALSE | FALSE |
|                                     | <i>Sneathia sanguinegens</i>        | 0.67  | 0     | FALSE | FALSE | FALSE | FALSE |
|                                     | <i>Lactobacillus iners</i>          | -0.63 | 0     | FALSE | FALSE | FALSE | FALSE |
|                                     | <i>Prevotella disiens</i>           | 0.51  | 1     | FALSE | FALSE | FALSE | FALSE |
|                                     | <i>Peptoniphilus</i>                | 0.14  | 0     | FALSE | FALSE | FALSE | FALSE |
|                                     | <i>Anaerococcus</i>                 | 0.42  | 0     | FALSE | FALSE | FALSE | FALSE |
|                                     | <i>Granulicatella</i>               | 0.70  | 0     | FALSE | FALSE | FALSE | FALSE |
|                                     | <i>Ureaplasma</i>                   | -0.27 | 0     | FALSE | FALSE | FALSE | FALSE |
|                                     | <i>Prevotella</i> spp. unclassified | 0.09  | 0     | FALSE | FALSE | FALSE | FALSE |
|                                     | <i>Facklamia</i>                    | 0.27  | 0     | FALSE | FALSE | FALSE | FALSE |
|                                     | <i>Fingoldia</i>                    | -0.03 | 0     | FALSE | FALSE | FALSE | FALSE |
|                                     | <i>Aerococcus</i>                   | -0.31 | 0     | FALSE | FALSE | FALSE | FALSE |
|                                     | <i>Haemophilus</i>                  | -0.21 | 0     | FALSE | FALSE | FALSE | FALSE |
|                                     | <i>Dialister</i>                    | 0.12  | 0     | FALSE | FALSE | FALSE | FALSE |
|                                     | <i>Dermabacter</i>                  | 0.14  | 0     | FALSE | FALSE | FALSE | FALSE |
|                                     | <i>Howardella</i>                   | 0.15  | 0     | FALSE | FALSE | FALSE | FALSE |
|                                     | <i>Actinotignum</i>                 | -0.24 | 0     | FALSE | FALSE | FALSE | FALSE |
|                                     | <i>Prevotella melaninogenica</i>    | -0.11 | 0     | FALSE | FALSE | FALSE | FALSE |
|                                     | <i>Atopobium deltae</i>             | -0.14 | 0     | FALSE | FALSE | FALSE | FALSE |
|                                     | <i>Negativicoccus</i>               | -0.06 | 0     | FALSE | FALSE | FALSE | FALSE |
|                                     | <i>Peptococcus</i>                  | -0.04 | 0     | FALSE | FALSE | FALSE | FALSE |
|                                     | <i>Peptostreptococcus</i>           | -0.19 | 0     | FALSE | FALSE | FALSE | FALSE |
|                                     | <i>Veillonella</i>                  | -0.22 | 0     | FALSE | FALSE | FALSE | FALSE |
|                                     | <i>Rothia</i>                       | -0.34 | 0     | FALSE | FALSE | FALSE | FALSE |
|                                     | <i>Porphyromonas</i>                | -0.52 | 0     | FALSE | FALSE | FALSE | FALSE |
|                                     | <i>Micrococcus</i>                  | -0.37 | 0     | FALSE | FALSE | FALSE | FALSE |
|                                     | <i>Escherichia/Shigella</i>         | -0.56 | 0     | FALSE | FALSE | FALSE | FALSE |
|                                     | <i>Varibaculum</i>                  | -0.47 | 1     | FALSE | FALSE | FALSE | FALSE |
|                                     | <i>Murdochiella</i>                 | -0.45 | 0     | FALSE | FALSE | FALSE | FALSE |
|                                     | <i>Actinomyces</i>                  | -0.35 | 0     | FALSE | FALSE | FALSE | FALSE |
|                                     | <i>Fenollaria</i>                   | -0.68 | 0     | FALSE | FALSE | FALSE | FALSE |
|                                     | <i>Prevotellaceae</i>               | -0.69 | 0     | FALSE | FALSE | FALSE | FALSE |
|                                     | <i>Staphylococcus</i>               | -0.46 | 0     | FALSE | FALSE | FALSE | FALSE |
|                                     | <i>Campylobacter</i>                | -0.50 | 0     | FALSE | FALSE | FALSE | FALSE |
|                                     | <i>Propionimicrobium</i>            | -0.70 | 0     | FALSE | FALSE | FALSE | FALSE |
|                                     | <i>Mobiluncus</i>                   | -0.77 | 0     | FALSE | FALSE | FALSE | FALSE |
|                                     | <i>Sutterella</i>                   | -0.60 | 0     | FALSE | FALSE | FALSE | FALSE |
|                                     | <i>Lawsonella</i>                   | -1.64 | 0     | FALSE | FALSE | FALSE | FALSE |
|                                     | <i>Atopobium parvulum</i>           | 0.26  | Inf   | TRUE  | TRUE  | TRUE  | TRUE  |
| <i>Coriobacteriales Inc Se</i>      | 0.43                                | Inf   | TRUE  | TRUE  | TRUE  | TRUE  |       |
| <i>Acinetobacter</i>                | -0.06                               | Inf   | TRUE  | TRUE  | TRUE  | TRUE  |       |
| <i>Cutibacterium</i>                | 0.31                                | Inf   | TRUE  | TRUE  | TRUE  | TRUE  |       |
| <i>Enterobacter</i>                 | 0.02                                | Inf   | TRUE  | TRUE  | TRUE  | TRUE  |       |
| <i>Micrococcus</i>                  | 0.00                                | Inf   | TRUE  | TRUE  | TRUE  | TRUE  |       |
| <i>Murdochiella</i>                 | 0.17                                | Inf   | TRUE  | TRUE  | TRUE  | TRUE  |       |
| <i>Pseudoclavibacter</i>            | 0.17                                | Inf   | TRUE  | TRUE  | TRUE  | TRUE  |       |
| <i>Ruminococcaceae UCG014</i>       | 0.21                                | Inf   | TRUE  | TRUE  | TRUE  | TRUE  |       |
| <i>Lactobacillus crispatus</i>      | 0.11                                | Inf   | TRUE  | TRUE  | TRUE  | TRUE  |       |
| <i>Lactobacillus gasseri</i>        | 0.13                                | Inf   | TRUE  | TRUE  | TRUE  | TRUE  |       |
| <i>Lactobacillus jensenii</i>       | 0.13                                | Inf   | TRUE  | TRUE  | TRUE  | TRUE  |       |
| <i>Prevotella buccalis</i>          | 0.07                                | Inf   | TRUE  | TRUE  | TRUE  | TRUE  |       |
| <i>Fingoldia</i>                    | 0.61                                | 0     | FALSE | FALSE | FALSE | FALSE |       |
| <i>Prevotella bivia</i>             | 1.53                                | 0     | FALSE | FALSE | FALSE | FALSE |       |
| <i>Prevotella disiens</i>           | 1.68                                | 0     | FALSE | FALSE | FALSE | FALSE |       |
| <i>Anaerococcus</i>                 | 0.68                                | 0     | FALSE | FALSE | FALSE | FALSE |       |
| <i>Peptoniphilus</i>                | 0.38                                | 0     | FALSE | FALSE | FALSE | FALSE |       |
| <i>Prevotella</i> spp. unclassified | 0.57                                | 0     | FALSE | FALSE | FALSE | FALSE |       |
| <i>Dialister</i>                    | 1.25                                | 0     | FALSE | FALSE | FALSE | FALSE |       |
| <i>Prevotella timonensis</i>        | 0.89                                | 0     | FALSE | FALSE | FALSE | FALSE |       |

Table S4. Analysis of Composition of Microbiomes (ANCOM) of longitudinal vaginal, cutaneous penile and urethral specimens from couples that were cured vs couples who recurred<sup>a</sup>

|                             |                                    |       |       |       |       |       |       |
|-----------------------------|------------------------------------|-------|-------|-------|-------|-------|-------|
| Urethral microbiota         | <i>Corynebacterium</i>             | -0.99 | 0     | FALSE | FALSE | FALSE | FALSE |
|                             | <i>Pseudomonas</i>                 | 1.08  | 0     | FALSE | FALSE | FALSE | FALSE |
|                             | <i>Gemella</i>                     | 1.46  | 0     | FALSE | FALSE | FALSE | FALSE |
|                             | <i>Porphyromonas</i>               | 0.53  | 0     | FALSE | FALSE | FALSE | FALSE |
|                             | <i>Fenollaria</i>                  | 0.37  | 0     | FALSE | FALSE | FALSE | FALSE |
|                             | <i>Veillonella</i>                 | 0.00  | 0     | FALSE | FALSE | FALSE | FALSE |
|                             | <i>Neisseria</i>                   | 0.28  | 0     | FALSE | FALSE | FALSE | FALSE |
|                             | <i>Haemophilus</i>                 | 0.30  | 0     | FALSE | FALSE | FALSE | FALSE |
|                             | <i>Gardnerella</i>                 | 0.56  | 0     | FALSE | FALSE | FALSE | FALSE |
|                             | <i>Aerococcus</i>                  | 0.21  | 0     | FALSE | FALSE | FALSE | FALSE |
|                             | <i>Prevotella melaninogenica</i>   | 0.37  | 0     | FALSE | FALSE | FALSE | FALSE |
|                             | <i>Peptostreptococcus</i>          | 0.28  | 0     | FALSE | FALSE | FALSE | FALSE |
|                             | <i>Actinomyces</i>                 | 0.46  | 0     | FALSE | FALSE | FALSE | FALSE |
|                             | <i>Prevotellaceae</i>              | -0.10 | 0     | FALSE | FALSE | FALSE | FALSE |
|                             | <i>Rothia</i>                      | -0.04 | 0     | FALSE | FALSE | FALSE | FALSE |
|                             | <i>Sutterella</i>                  | 0.26  | 0     | FALSE | FALSE | FALSE | FALSE |
|                             | <i>Campylobacter</i>               | -0.15 | 0     | FALSE | FALSE | FALSE | FALSE |
|                             | <i>Granulicatella</i>              | 0.15  | 0     | FALSE | FALSE | FALSE | FALSE |
|                             | <i>Fusobacterium</i>               | 0.27  | 0     | FALSE | FALSE | FALSE | FALSE |
|                             | <i>Prevotella nanceiensis</i>      | 0.03  | 0     | FALSE | FALSE | FALSE | FALSE |
|                             | <i>Negativicoccus</i>              | 0.10  | 0     | FALSE | FALSE | FALSE | FALSE |
|                             | <i>Muribaculaceae</i>              | -0.07 | 0     | FALSE | FALSE | FALSE | FALSE |
|                             | <i>Staphylococcus</i>              | -1.94 | 0     | FALSE | FALSE | FALSE | FALSE |
|                             | <i>Prevotella corporis</i>         | -0.05 | 0     | FALSE | FALSE | FALSE | FALSE |
|                             | <i>Atopobium deltae</i>            | -0.17 | 1     | FALSE | FALSE | FALSE | FALSE |
|                             | <i>Mobiluncus</i>                  | -0.44 | 0     | FALSE | FALSE | FALSE | FALSE |
|                             | <i>Streptococcus</i>               | -1.10 | 0     | FALSE | FALSE | FALSE | FALSE |
|                             | <i>Dermabacter</i>                 | 0.04  | 0     | FALSE | FALSE | FALSE | FALSE |
|                             | <i>Peptococcus</i>                 | -0.22 | 0     | FALSE | FALSE | FALSE | FALSE |
|                             | <i>Enterococcus</i>                | -0.96 | 0     | FALSE | FALSE | FALSE | FALSE |
|                             | <i>Bergeyella</i>                  | -0.30 | 0     | FALSE | FALSE | FALSE | FALSE |
|                             | <i>Howardella</i>                  | 0.03  | 0     | FALSE | FALSE | FALSE | FALSE |
|                             | <i>Alloprevotella</i>              | -0.38 | 0     | FALSE | FALSE | FALSE | FALSE |
|                             | <i>Atopobium spp. unclassified</i> | -0.32 | 0     | FALSE | FALSE | FALSE | FALSE |
| <i>Actinotignum</i>         | -0.48                              | 0     | FALSE | FALSE | FALSE | FALSE |       |
| <i>Ezakiella</i>            | -0.52                              | 0     | FALSE | FALSE | FALSE | FALSE |       |
| <i>Solobacterium</i>        | -0.26                              | 0     | FALSE | FALSE | FALSE | FALSE |       |
| <i>Facklamia</i>            | -0.35                              | 0     | FALSE | FALSE | FALSE | FALSE |       |
| <i>Enhydrobacter</i>        | -0.43                              | 0     | FALSE | FALSE | FALSE | FALSE |       |
| <i>Alloscardovia</i>        | -0.52                              | 0     | FALSE | FALSE | FALSE | FALSE |       |
| <i>Propionimicrobium</i>    | -0.05                              | 0     | FALSE | FALSE | FALSE | FALSE |       |
| <i>Prevotella bergensis</i> | -0.71                              | 0     | FALSE | FALSE | FALSE | FALSE |       |
| <i>Ureaplasma</i>           | -0.79                              | 0     | FALSE | FALSE | FALSE | FALSE |       |
| <i>Lawsonella</i>           | 0.17                               | 0     | FALSE | FALSE | FALSE | FALSE |       |
| <i>Arcanobacterium</i>      | -0.85                              | 1     | FALSE | FALSE | FALSE | FALSE |       |
| <i>Lactobacillus iners</i>  | -1.25                              | 0     | FALSE | FALSE | FALSE | FALSE |       |
| <i>Varibaculum</i>          | -1.04                              | 0     | FALSE | FALSE | FALSE | FALSE |       |
| <i>Escherichia/Shigella</i> | -2.00                              | 0     | FALSE | FALSE | FALSE | FALSE |       |

CLR, centre log-ratio transformed relative abundance; Inf = indicates a taxa that was identified as a structural zero

<sup>a</sup>Specimens collected at day-0 and day-8 have been excluded from this analysis. Recurrence was defined as 3-4 Amsel criteria and NS=4-10 during the follow-up period

<sup>b</sup>CLR-mean difference represents the difference in the mean-CLR transformed abundance of a taxon between recurrence and cure cases

<sup>c</sup>W statistic - the number of comparisons in which the null hypothesis as rejected for that taxon

<sup>d</sup>A value of TRUE indicates that the null hypothesis was rejected in  $\geq 90\%$  of comparisons for that taxon

<sup>e</sup>A value of TRUE indicates that the null hypothesis was rejected in  $\geq 80\%$  of comparisons for that taxon

<sup>f</sup>A value of TRUE indicates that the null hypothesis was rejected in  $\geq 70\%$  of comparisons for that taxon

<sup>g</sup>A value of TRUE indicates that the null hypothesis was rejected in  $\geq 60\%$  of comparisons for that taxon
