# Supplementary material for: A Prospective, Open-Label Pilot Study of Concurrent Male Partner Treatment for Bacterial Vaginosis
Source: PubMed Central journal article supplement (PMC8524345; doi:10.1128/mbio.02323-21), 2021-10-19
Supplement: mbio.02323-21-st005.pdf [file mbio.02323-21-st005.pdf]

Table S5. Correlation of specific bacterial taxa between the genital microbiota of sexual partners longitudinally, stratified by BV recurrence status

| Taxon                                 | Cure cases longitudinal <sup>a</sup> |              |                  |              | Recurrence cases longitudinal <sup>b</sup> |         |                  |               |
|---------------------------------------|--------------------------------------|--------------|------------------|--------------|--------------------------------------------|---------|------------------|---------------|
|                                       | Vaginal/Penile <sup>c</sup>          |              | Vaginal/Urethral |              | Vaginal/Penile <sup>c</sup>                |         | Vaginal/Urethral |               |
|                                       | Corr                                 | P-value      | Corr             | P-value      | Corr                                       | P-value | Corr             | P-value       |
| <i>Aerococcus</i>                     | -                                    | -            | -                | -            | 0.678                                      | 0.1102  | 0.6474           | 0.1172        |
| <i>Anaerococcus</i>                   | 0.121                                | 0.3387       | -0.2141          | 0.0719       | -0.6097                                    | 0.3806  | -0.3777          | 0.5534        |
| <i>Atopobium vaginae</i>              | 0.0588                               | 0.4216       | 0.1783           | 0.033        | -                                          | -       | -                | -             |
| <i>Candidatus Lachnocurva vaginae</i> | -                                    | -            | -                | -            | -                                          | -       | -                | -             |
| <i>BVAB-2</i>                         | -0.0204                              | 0.7812       | 0.2487           | 0.008        | 0.1949                                     | 0.6603  | -                | -             |
| <i>Corynebacterium</i>                | <b>0.339</b>                         | <b>0.004</b> | -0.1708          | 0.1748       | -                                          | -       | -                | -             |
| <i>Dialister</i>                      | 0.1966                               | 0.0919       | 0.1051           | 0.3706       | 0.4554                                     | 0.4795  | 0.6013           | 0.2867        |
| <i>Enterobacter</i>                   | -                                    | -            | -                | -            | -                                          | -       | -                | -             |
| <i>Enterococcus</i>                   | <b>0.3297</b>                        | <b>0.001</b> | 0.2139           | 0.032        | 0.143                                      | 0.7596  | 0.0017           | 0.9961        |
| <i>Escherichia/Shigella</i>           | 0.2481                               | 0.025        | 0.0527           | 0.6344       | 0.173                                      | 0.7478  | 0.4172           | 0.4103        |
| <i>Fingoldia</i>                      | -0.0087                              | 0.9461       | -0.104           | 0.3936       | -0.4885                                    | 0.4475  | -0.0069          | 0.9899        |
| <i>Gardnerella</i>                    | <b>0.3495</b>                        | <b>0.003</b> | 0.2976           | 0.009        | -0.7743                                    | 0.5634  | -0.9361          | 0.5374        |
| <i>Lactobacillus crispatus</i>        | <b>0.4677</b>                        | <b>0.001</b> | <b>0.3299</b>    | <b>0.003</b> | -                                          | -       | -                | -             |
| <i>Lactobacillus gasseri</i>          | <b>0.413</b>                         | <b>0.001</b> | 0.2178           | 0.026        | -                                          | -       | -                | -             |
| <i>Lactobacillus iners</i>            | <b>0.3967</b>                        | <b>0.001</b> | <b>0.3152</b>    | <b>0.014</b> | -0.3783                                    | 0.5474  | <b>-0.9563</b>   | <b>0.0399</b> |
| <i>Lactobacillus jensenii</i>         | <b>0.3752</b>                        | <b>0.001</b> | 0.1316           | 0.0809       | -                                          | -       | -                | -             |
| <i>Megasphaera</i>                    | 0.0076                               | 0.9091       | -                | -            | -                                          | -       | -                | -             |
| <i>Peptoniphilus</i>                  | 0.0824                               | 0.5035       | -0.1825          | 0.1449       | -0.4508                                    | 0.4685  | -0.0386          | 0.946         |
| <i>Prevotella unclassified spp.</i>   | 0.1942                               | 0.1159       | 0.1075           | 0.3696       | 0.3471                                     | 0.5824  | 0.8418           | 0.0729        |
| <i>Prevotella bivia</i>               | 0.1384                               | 0.2398       | -0.0051          | 0.976        | 0.6383                                     | 0.2607  | 0.7131           | 0.1778        |
| <i>Prevotella disiens</i>             | 0.299                                | 0.012        | 0.1426           | 0.2008       | 0.0182                                     | 0.9829  | 0.7521           | 0.1328        |
| <i>Prevotella timonensis</i>          | <b>0.3751</b>                        | <b>0.001</b> | 0.2322           | 0.03         | 0.8648                                     | 0.0608  | <b>0.9662</b>    | <b>0.0079</b> |
| <i>Pseudomonas</i>                    | -                                    | -            | -                | -            | -                                          | -       | -                | -             |
| <i>Sneathia unclassified spp.</i>     | 0.018                                | 0.7952       | 0.0805           | 0.2827       | -                                          | -       | 0.6504           | 0.1029        |
| <i>Sneathia amnii</i>                 | 0.0983                               | 0.2318       | <b>0.3371</b>    | <b>0.005</b> | 0.6107                                     | 0.2266  | 0.8521           | 0.0579        |
| <i>Sneathia sanguinegens</i>          | 0.1509                               | 0.044        | 0.2266           | 0.014        | -0.0249                                    | 0.9698  | -0.0793          | 0.9099        |
| <i>Staphylococcus</i>                 | 0.2773                               | 0.019        | -0.0039          | 0.969        | 0.6512                                     | 0.131   | 0.7155           | 0.1121        |
| <i>Streptococcus</i>                  | 0.2151                               | 0.0649       | 0.0497           | 0.6893       | -0.0853                                    | 0.8613  | 0.7438           | 0.0611        |
| <i>Ureaplasma</i>                     | 0.116                                | 0.2957       | 0.1738           | 0.1828       | 0.0866                                     | 0.8809  | 0.1245           | 0.8549        |

Corr, SparCC correlation coefficient; - indicates the taxa was not detected in one or more specimen type for that study time point. The 10 ten most abundant bacteria at each site and 8 bacteria previously associated with BV are presented in this table. Correlations with an absolute correlation coefficient >0.3 and P<0.05 were considered significant and have been bolded in this table

<sup>a</sup> Includes 63 vaginal, 63 cutaneous penile and 63 urethral specimens from 23 couples where the female was cured

<sup>b</sup> Includes 5 vaginal, 5 cutaneous penile and 5 urethral specimens from 4 couples where the female experienced BV recurrence during the follow-up period

<sup>c</sup> Penile refers to cutaneous penile specimens
