# Supplementary material for: A Prospective, Open-Label Pilot Study of Concurrent Male Partner Treatment for Bacterial Vaginosis
Source: PubMed Central journal article supplement (PMC8524345; doi:10.1128/mbio.02323-21), 2021-10-19
Supplement: mbio.02323-21-st006.pdf [file mbio.02323-21-st006.pdf]

Table S6. List of controls processed alongside biological specimens

| <b>Control type</b>         | <b>Details</b>                                                                                                                   |
|-----------------------------|----------------------------------------------------------------------------------------------------------------------------------|
| Reagent/Extraction Controls | PBS<br>AssayAssure® Genelock (SierraMolecular, USA)<br>Ultrapure water                                                           |
| PCR negative controls       |                                                                                                                                  |
| Positive control            | BEI resources HM-276D Genomic DNA from Microbial Mock Community B<br>ZymoBIOMICS™ Microbial Community Standard Catalog No. D6300 |
