# Supplementary material for: A Prospective, Open-Label Pilot Study of Concurrent Male Partner Treatment for Bacterial Vaginosis
Source: PubMed Central journal article supplement (PMC8524345; doi:10.1128/mbio.02323-21), 2021-10-19
Supplement: mbio.02323-21-st007.pdf [file mbio.02323-21-st007.pdf]

Table S7. ASVs identified as potential contaminants

| ASV no. | Phylum   | Class            | Order               | Family                | Genus                 | Total prevalence (%)                               | Total read count | Vaginal prevalence (%) | Vaginal read count | Cutaneous penile prevalence (%) | Cutaneous penile read count | Urine prevalence (%) | Urine read count | Negative control prevalence (%) | Negative control read count | Notes  | Sequence                                                                                         |                                                                                                                                                                                                                                                                                                                                                                                                                                         |
|---------|----------|------------------|---------------------|-----------------------|-----------------------|----------------------------------------------------|------------------|------------------------|--------------------|---------------------------------|-----------------------------|----------------------|------------------|---------------------------------|-----------------------------|--------|--------------------------------------------------------------------------------------------------|-----------------------------------------------------------------------------------------------------------------------------------------------------------------------------------------------------------------------------------------------------------------------------------------------------------------------------------------------------------------------------------------------------------------------------------------|
| ASV2    | Bacteria | Proteobacteria   | Gammaproteobacteria | Burkholderiales       | Burkholderiaceae      | Burkholderia-Caballeronia-Paraburkholderia         | 36               | 737907                 | 6                  | 85                              | 17                          | 6176                 | 87               | 630598                          | 51                          | 101048 | *Excluded as identified as highly abundant in AssayAssure® Genelock (urine stabilisation medium) | TGGGGAATTTGGACAAATGGGCGAAAGCCTGATCCAGCATGCCGGTGTGTGMAAGAGGCTTCGGGTTGTAAGACACTT<br>TTGTCGGGAAGAATCTTGGCTCTAATACAGTGGGGGGTACGGTACGGAGAGATAGACCAGGCTAACTAGCTGCC<br>AGCACCGCGGTAATACGTAAGGCTGAGCGTAAATCGGAATACGCGAATACGCGAATGAGCGGCGGCTTAAAGCAAC<br>GATGTGAATCCCCGGGCTCAACTGGGAACCTGATGGTCACTGGGCAAGCTAGATGGAGAGATGGAGAGGAGGAGGATAGCC<br>ACGCTGACGATGAAATGCGTAGAGATGTGGAGAAATACCGATGGGGAAGGAGCCCGCCGCGCACTAGACGCTCAT<br>GCGGAAGGCTGGGAGCAAA |
| ASV5    | Bacteria | Proteobacteria   | Gammaproteobacteria | Pseudomonadales       | Pseudomonadaceae      | Pseudomonas                                        | 48               | 446900                 | 22                 | 376                             | 45                          | 46620                | 68               | 45644                           | 95                          | 354260 |                                                                                                  | TGGGGAATTTGGACAAATGGGCGAAAGCCTGATCCAGCATGCCGGTGTGTGMAAGAGGCTTCGGGTTGTAAGACACTT<br>TAAGTTGGGAGAGGAGGCTAAATAAATACCTGTTTGGCTTACGACAGATAGACCAGGCTAACTGCTGCCA<br>GCAGCCGGTAATACAGAGGGTGAAGCGTAACTGGGAATACGGGAATACGGGCTAAAGCGCGCTAGGTTGTTGTAAGTTGG<br>ATGTGAATCCCCGGGCTCAACTGGGAACCTGATGCAAACTGACGAGCTAGATGTTGTAAGGCTGTGGAAATTCCT<br>GTGTAGGCTGAAATGCTAGATAGTAAGGAAGAACACCGATGGGAGAGGAGCCACTGGACTGACTGACTAGCTAGCT<br>GCGAAAGGCTGGGAGCAAA      |
| ASV44   | Bacteria | Proteobacteria   | Alphaproteobacteria | Rhizobiales           | Rhizobiaceae          | Allorhizobium-Neorhizobium-Pararhizobium-Rhizobium | 17               | 47528                  | 0                  | 0                               | 0                           | 0                    | 55               | 32894                           | 12                          | 14634  | *Excluded as identified as highly abundant in AssayAssure® Genelock (urine stabilisation medium) | TGGGGAATTTGGACAAATGGGCGAAAGCCTGATCCAGCATGCCGGTGTGTGMAAGAGGCTTCGGGTTGTAAGACACTT<br>TCACGAGAGATAATGAGCTATCCGAGAGAGAGCCCGCTTACTCTGCCAGAAAGCCGGTAACTGAGGSG<br>GCTAGCGTTTGGGAATACGGGCTAAGCCAGCTAGGGGATGATGCTGACAGGCTGAATCCAGGGCTCAACC<br>CTGGAACGCTTGTATGATGCTGATGAGATGAGAGAGGATGATGGAAATCCGAGTGTAGAGGTGAATGTGATGAT<br>ATTCGGAGAACACCGATGGGGAAGGGCGCTACTGTCTCACTGACGCTGAGGTGGAAGGCTGGGAGCAAA                                                 |
| ASV121  | Bacteria | Actinobacteriota | Actinobacteria      | Micrococcales         | Microbacteriaceae     | Leifsonia                                          | 13               | 13937                  | 0                  | 0                               | 0                           | 0                    | 43               | 9901                            | 10                          | 4036   | *Excluded as identified as highly abundant in AssayAssure® Genelock (urine stabilisation medium) | TGGGGAATTTGGACAAATGGGCGAAAGCCTGATCCAGCATGCCGGTGTGTGMAAGAGGCTTCGGGTTGTAAGACACTT<br>TTAGTAGGGAAGGAAAGTGAAGCTACTGAGAAAAGCCCGCTAACTAGCTGCCAGCCGGGCTAATAGCT<br>AGGGTGGAGCGTGTGCGGAATATTGGGCTAAAGACTGTAGGGCGTCTGCGCTCTCTGTGAALCCGAGGCT<br>CACTCCGGGCTCACTGGGCTGGGAGAGATGCTGGGAGGAGATGGATTTCTGTGTACGCTGGGGAATGCG<br>GCGATATACGAGGAAACCGATGGGAGGCACTCTCTGGCCAACTAGCGCTAGGAGCAAGCGCTGGGAGCG<br>GAACA                                             |
| ASV26   | Bacteria | Proteobacteria   | Gammaproteobacteria | Pseudomonadales       | Pseudomonadaceae      | Pseudomonas                                        | 25               | 96086                  | 2                  | 351                             | 25                          | 34426                | 36               | 20665                           | 85                          | 41244  |                                                                                                  | TGGGGAATTTGGACAAATGGGCGAAAGCCTGATCCAGCATGCCGGTGTGTGMAAGAGGCTTCGGGTTGTAAGACACTT<br>TAAGTTGGGAGAGGTTGATGATTAATGCTCAATTTGACCTTACCGACAGATAAGCACCGGCTAACTGCTGCCA<br>GCAGCCGGTAATACAGAGGGTGAAGCGTAACTGGGAATACGGGCTAAAGCGCGCTAGGTTGTTGTAAGTTGG<br>ATGTGAATCCCCGGGCTCAACTGGGAACCTGATGCAAACTGACGAGCTAGATGTTGTAAGGCTGTGGAAATTCCT<br>GTGTAGGCTGAAATGCTAGATAGTAAGGAAGAACACCGATGGGAGAGGAGCCACTGGACTGACTGACTAGCTAGCT<br>GCGAAAGGCTGGGAGCAAA           |
| ASV120  | Bacteria | Proteobacteria   | Alphaproteobacteria | Sphingomonadales      | Sphingomonadaceae     | Novosphingobium                                    | 17               | 13813                  | 0                  | 0                               | 13                          | 1419                 | 31               | 1783                            | 51                          | 10611  |                                                                                                  | TGGGGAATTTGGACAAATGGGCGAAAGCCTGATCCAGCATGCCGGTGTGTGMAAGAGGCTTCGGGTTGTAAGACACTT<br>TTACAGGGAATGATATGACATGCTGGGAATAAGCTCCGGTAACTCGTCCAGCACCGCGGCTAATACGAGGAGG<br>CTAGCGTGTTCGGAAATTTGGGCTAAAGCGCATGAGCGGTATCACTAGCAGAGTGAAGCCGGGCTCAACC<br>CGGAACTGCTTAACTGACTGGAGTGGAACTTGGAACTTGGAGCGGAGTGAATCCGAGTGTAGAGGTAACTGATGA<br>TTGCGAAACACCGATGGGAGGCGACTCGCTGCAAAATATGACGCTGAGTGGGAAAGCGCTGGGAGCAAA                                           |
| ASV100  | Bacteria | Firmicutes       | Bacilli             | Bacillales            | Bacillaceae           | Bacillus                                           | 19               | 16653                  | 0                  | 0                               | 16                          | 1167                 | 26               | 2187                            | 83                          | 13299  |                                                                                                  | TAGGGAATTTGCGCAATGGGCGAAAGCCTGATCCAGCATGCCGGTGTGTGMAAGAGGCTTCGGGTTGTAAGACACTT<br>TTGTAGGGAAGAACAGTGGCTTGAATAGGCGGCACTGAGGCTACTACGAAAGCAAGCGCTAACTAGCTGCCA<br>CAGACCGCGTAACTAGTGGTGGCAAGCGTTTCCGGAATATTGGGCTAAAGCGCGGAGCGGCTCTTAAGTGC<br>TGATGTAAAGCCCACTGCACTGAGGCTGATGGAACTGGGAAGCTGAGTGAAGAGGAGGAGTGAATTC<br>CACTGTAGCGTGAATGCTAGATGTGGAGAAACACCGATGGGAGGAGCCACTGCTGCTGTAACTGACGCTGAG<br>GCGGAAGGCTGGGAGCAAA                          |
| ASV110  | Bacteria | Proteobacteria   | Gammaproteobacteria | Enterobacteriales     | Yersiniaceae          | Serratia                                           | 13               | 15471                  | 1                  | 9                               | 15                          | 2211                 | 17               | 1130                            | 39                          | 12121  |                                                                                                  | TGGGGAATTTGGACAAATGGGCGAAAGCCTGATCCAGCATGCCGGTGTGTGMAAGAGGCTTCGGGTTGTAAGACACTT<br>TCAGCGAGAGAGGAGGCTGAGTGAATTAATGACTGTTTATGACTGCTTACGACAGAGAGAGCCGCTAACTGCTGCCA<br>GCAGCCGGTAATACAGAGGGTGAAGCGTAACTGGGAATACGGGCTAAAGCGCAAGCCAGCGGTTTAAATGACA<br>GATGTGAATCCCCGGGCTCAACTGGGAACCTGATGCAAACTGACGAGCTAGATGTTGTAAGGCGGTTAGAAATCCA<br>GGTGTAGCGTGAATGCTAGAGATGCGGAAGATAACCGTGGGAGGAGCGCCCTGGACAAGACTGACGCTCAGG<br>TGGAAAGGCTGGGAGCAAA         |
| ASV227  | Bacteria | Proteobacteria   | Gammaproteobacteria | Burkholderiales       | Comamonadaceae        | Curvibacter                                        | 10               | 5564                   | 0                  | 0                               | 8                           | 436                  | 16               | 262                             | 44                          | 4866   |                                                                                                  | TGGGGAATTTGGACAAATGGGCGAAAGCCTGATCCAGCATGCCGGTGTGTGMAAGAGGCTTCGGGTTGTAAGACACTT<br>TGATCGGAGCAAGAAAGGTTTGGCTAATAGCTGACTCATGACGCTACCGTAAAGGCTAAAGCGGCTAACTAGCTGCCA<br>GCAGCCGGTAATACAGAGGGTGAAGCGTAACTGGGAATACGGGCTAAAGCGCAAGCCAGCGGTTTAAATGACA<br>GATGTGAATCCCCGGGCTCAACTGGGAACCTGATGCAAACTGACGAGCTAGATGTTGTAAGGCTGTGGAAATTC<br>CTGTAGCGTGAATGCTAGATATGCGGAAGAACACCGATGGGAGGAGCCACTGCGCTGCTGACTGACGCTCAG<br>ACGAAAGGCTGGGAGCAAA          |
| ASV257  | Bacteria | Bacteroidota     | Bacteroidia         | Cytophagales          | Spirosomaceae         | Flectobacillus                                     | 8                | 4795                   | 0                  | 0                               | 7                           | 725                  | 14               | 467                             | 22                          | 3603   |                                                                                                  | TAGGGAATTTGGGCAATGGGCGAAAGCCTGATCCAGCATGCCGGTGTGTGMAAGAGGCTTCGGGTTGTAAGACACTT<br>TTTTATAGGAAGAGGACTTGGAGGTTTGGTACGGTACTAATAAGTAAGCACCGGCTAACTCGTCCAGCAGC<br>CCGGTAATACAGAGGATCCAGGCTTCCGGAATATTGGGTTAAGGGTCCGATGGCGCTTAAATGCTAGTGGT<br>GAAATCCGGAGCTAACTGTAATGCTGATGACTGACTGGGCTGAATGTGTGTAAGTACTAGATATGTAGTGA<br>CGGCTGAATGCTAGATATACGAATCAATGGCAAGCGGCTACTACAAATCACTAGCGCTGTGGAGCAAA<br>GGTGGGATGCAAA                                 |
| ASV205  | Bacteria | Bacteroidota     | Bacteroidia         | Flavobacteriales      | Flavobacteriaceae     | Flavobacterium                                     | 8                | 6467                   | 0                  | 0                               | 6                           | 278                  | 14               | 708                             | 29                          | 5481   |                                                                                                  | TGGGGAATTTGGACAAATGGGCGAAAGCCTGATCCAGCATGCCGGTGTGTGMAAGAGGCTTCGGGTTGTAAGACACTT<br>TTGTACGGGAAGAACACTCTACGAGTAGGAGCTGAGCGTACCGTAAGTAAGATCGGCTAACTCGTCCAGCAGC<br>CCCGGTAATACAGAGGATCCAGGCTTACCGAATATTGGGTTAAGGGTCCGATGGCGCTTAAATGCTAGTGGT<br>GAAATCCGGAGCTAACTGTAATGCTGATGACTGACTGGGCTGAATGTGTGTAAGTACTAGATATGTAGTGA<br>CGGCTGAATGCTAGATATACGAATCAATGGCAAGCGGCTACTACAAATCACTAGCGCTGTGGAGCAAA<br>GGTGGGATGCAAA                             |
| ASV34   | Bacteria | Proteobacteria   | Alphaproteobacteria | Paracaeidibacteriales | Paracaeidibacteraceae | Candidatus_Finniella                               | 7                | 3056                   | 1                  | 2                               | 2                           | 164                  | 14               | 489                             | 29                          | 2401   |                                                                                                  | TGGGGAATTTGGACAAATGGGCGAAAGCCTGATCCAGCATGCCGGTGTGTGMAAGAGGCTTCGGGTTGTAAGACACTT<br>TTGTAGGGAAGAACAGTGGGAGTAACTGCTGCCACTTACCGTACTACGAAAGCGCAAGCCGCTAACTAGCTGCC<br>AGCACCGCGTAACTAGTGGTGAAGCGTGTTCGGAATATTGGGCTAAAGCGCGGAGCGGCTTAACTGACTG<br>TGATGAAAGCCCGGCTCAACTGGGAGGCTTAAAGCACTGGGAGCTAGTGGAGAGTGGTGAAGAGGAGTGAATTC<br>ACGTTAGCGGTAAGTGTAGAGATGTGGAGAACACCGATGGGAGGAGCCACTGCGCTGCTGCTGACTGACGCTGAG<br>GCGGAAGGCTGGGAGCAAA              |
| ASV202  | Bacteria | Firmicutes       | Bacilli             | Bacillales            | Bacillaceae           | Bacillus                                           | 7                | 6841                   | 0                  | 0                               | 3                           | 173                  | 12               | 380                             | 34                          | 6288   |                                                                                                  | TAGGGAATTTGCGCAATGGGCGAAAGCCTGATCCAGCATGCCGGTGTGTGMAAGAGGCTTCGGGTTGTAAGACACTT<br>TTGTAGGGAAGAACAGTGGGAGTAACTGCTGCCACTTACCGTACTACGAAAGCGCAAGCCGCTAACTAGCTGCC<br>AGCACCGCGTAACTAGTGGTGAAGCGTGTTCGGAATATTGGGCTAAAGCGCGGAGCGGCTTAACTGACTG<br>GATGTGAAGCCCGGCTCAACTGGGAGGCTTAAAGCACTGGGAGCTAGTGGAGAGTGGTGAAGAGGAGTGAATTC<br>ACGTTAGCGGTAAGTGTAGAGATGTGGAGAACACCGATGGGAGGAGCCACTGCGCTGCTGCTGACTGACGCTGAG<br>GCGGAAGGCTGGGAGCAAA               |
| ASV141  | Bacteria | Proteobacteria   | Gammaproteobacteria | Pseudomonadales       | Pseudomonadaceae      | Pseudomonas                                        | 9                | 11465                  | 0                  | 0                               | 10                          | 1129                 | 10               | 704                             | 37                          | 9632   |                                                                                                  | TGGGGAATTTGGACAAATGGGCGAAAGCCTGATCCAGCATGCCGGTGTGTGMAAGAGGCTTCGGGTTGTAAGACACTT<br>TAAGTTGGGAGAGGAGGCTAAATAAATACCTGTTTGGCTTACGACAGATAGACCAGGCTAACTGCTGCCA<br>GCAGCCGGTAATACAGAGGGTGAAGCGTAACTGGGAATACGGGCTAAAGCGCGCTAGGTTGTTGTAAGTTGG<br>ATGTGAATCCCCGGGCTCAACTGGGAACCTGATGCAAACTGACGAGCTAGATGTTGTAAGGCTGTGGAAATTCCT<br>GTGTAGGCTGAAATGCTAGATAGTAAGGAAGAACACCGATGGGAGGAGCCACTGGACTGACTGACTGACTAGCT<br>GCGAAAGGCTGGGAGCAAA                |
| ASV583  | Bacteria | Proteobacteria   | Alphaproteobacteria | SAR11_clade           | Clade_I               | Clade_Ia                                           | 12               | 1110                   | 16                 | 377                             | 8                           | 171                  | 9                | 399                             | 24                          | 163    |                                                                                                  | TGGGGAATTTGACAAATGGGCGAAAGCCTGATCCAGCATGCCGGTGTGTGMAAGAGGCTTCGGGTTGTAAGACACTT<br>TTGTCGGGAGAGAAATGACTTACCGAATAAGAGGCTGGCGTAACTGCTGCCAGAGCCGCGTAACTAGCAGGAGCA<br>CTAGCGTATTGCGGAATTTAGCGGCTAAGAGTCTGATGAGTGGTGAAGAGTGTAGTGGTGAATCCAGACGTAATCT<br>GGAAGCTCAAAAACCTTCACTGAGATGATAGAGGAAGCAAGTAATCTAGTGTAGAGTGAATTCGATGATATT<br>AGAAAGATAACAAATGCGAAGGCGACTTCTGGATCACTAGCTGACACTGGAACGAAAGCTGGGAGCAAA                                       |



Table S7. ASVs identified as potential contaminants

| ASV no. | Phylum   | Class          | Order               | Family             | Genus              | Total prevalence (%)        | Total read count | Vaginal prevalence (%) | Vaginal read count | Cutaneous penile prevalence (%) | Cutaneous penile read count | Urine prevalence (%) | Urine read count | Negative control prevalence (%) | Negative control read count | Notes | Sequence                                                                                                                                                                                                                                                                                                                                                                                                                                                                                   |
|---------|----------|----------------|---------------------|--------------------|--------------------|-----------------------------|------------------|------------------------|--------------------|---------------------------------|-----------------------------|----------------------|------------------|---------------------------------|-----------------------------|-------|--------------------------------------------------------------------------------------------------------------------------------------------------------------------------------------------------------------------------------------------------------------------------------------------------------------------------------------------------------------------------------------------------------------------------------------------------------------------------------------------|
| ASV168  | Bacteria | Proteobacteria | Gammaproteobacteria | Pseudomonadales    | Pseudomonadaceae   | Pseudomonas                 | 5                | 8725                   | 1                  | 13                              | 6                           | 1137                 | 4                | 881                             | 29                          | 6694  | TGGGGAATTTGGCAATGGGGCAACCGCTGATCCAGCATGCCGGTGTGTGAGAGGCTCTCGATGTAAAGCACTT<br>TTAGTTGGGAGGAAGGGGAGTAACTAACTACTTCTGCTTTTGGAGTTACCGACAGATAGACCGGTAACCTCTGTCCA<br>GCAGCCGGTAATACAGAGGGTGAAGCGTAACTCGAATCTGGCGTAAAGCGCGCTAGGTGCTGTAAGTTGG<br>ATGTGAATCCCGGGCTCAACTGGGAAGTCTTCAAACTGTCGAGCTAGATATGTAGAGAGGGTGGGAATTTCT<br>GTGTAGCGTGAATGCTAGATATAGGAAGAACACAGTGGGGAAGGCAACCCCTGGACTGACTGACTGACAGGT<br>GCAGAAAGCTGGGAGCAAA                                                                        |
| ASV208  | Bacteria | Proteobacteria | Gammaproteobacteria | Burkholderiales    | Comamonadaceae     | Deffia                      | 4                | 6530                   | 1                  | 2                               | 5                           | 4480                 | 4                | 191                             | 17                          | 1857  | TGGGGAATTTGGCAATGGGGCAACCGCTGATCCAGCATGCCGGTGTGAGGAAGGCTTCGGTGTAAAGCACTT<br>TTGTAGGGAAGCAAAAGCTTCTCTAATACAGAGAGGCTGAGCGTACCGTACAGATAGACCGGTAACCTAGTGGC<br>AGCACCGGGTAATACGTAGGGTGGAGGCTTATCGGAATACTGGCGTAAAGCGTGGCAGCGGCTTATTAAGAC<br>AGATGAAATCCCGGGCTCAACTGGGAAGTCTGATTTGACTGATGCTGCTAGAGTACGGTAGAGGGGATGGAATCC<br>CGCTGTAGCAGTGAATGCTAGATATCGGAGGAACACCGATGGCGAAGGCAACCCCTGGGATATCTGACGCTCATG<br>CACGAAAGCTGGGAGCAAA                                                                    |
| ASV332  | Bacteria | Proteobacteria | Gammaproteobacteria | Burkholderiales    | Alcaligenaceae     | Advenella                   | 1                | 3290                   | 0                  | 0                               | 0                           | 0                    | 4                | 349                             | 2                           | 2941  | TGGGGAATTTGGCAATGGGGCAACCGCTGATCCAGCATGCCGGTGTGAGGAAGGCTTCGGTGTAAAGCACTT<br>TTGTAGGGAAGAAAGGTTTGGGATAACTGGAGACTGATGAGCGTACCTGAGATAGAACCGGCTACTAGTGGTCCA<br>GCACCCCGTAACTCGGTGGTGAAGGCTTATCGGATCTGGGTAAGCGTAAAGCGTGAAGCGGCTGGGATTC<br>GATGTGAATCCAGGGCTCAACTGGAACTGCAITTTTAACTCCGAACTAGATATGTCAGAGGGGGTGAATTCAC<br>GTGTAGAGTGAATGCTAGATATGTGAGGAACACCGATGGGAGGCAACCCCTGGGATATCTGACGCTCATGCA<br>CGAAAGCTGGGAGCAAA                                                                            |
| ASV1434 | Bacteria | Proteobacteria | Gammaproteobacteria | Alteromonadales    | Alteromonadaceae   | Glaciocola                  | 3                | 144                    | 2                  | 21                              | 5                           | 66                   | 3                | 47                              | 5                           | 10    | TGGGGAATTTGGCAATGGGGCAACCGCTGATCCAGCATGCCGGTGTGAGGAAGGCTTCGGTGTAAAGCACTT<br>TCAGTGGGAAGAAAGGCTGTGGTAACTCCGTCAGGAAGGACATCACCCAGGAAGACCGGCTACTCGTGGCC<br>GCAGCCCGTAAACGAGGGTGGAGCGTAACTCGAATCTGGCGTAAAGCGGCTAGGCTGTAAAGCACTT<br>GTTTGAAGAACCCCGGCTCAACTGGGAGTGGAGTGGAGTGGAGTGGAGTGGAGTGGAGTGGAGTGGAGTGGAGT<br>CCGCTGACCGGTAATGCTAGATATCGGAGGAATACAGTGGGAGGCGGCTTCGGTGTAAAGCACTT<br>GTGCGAAGCTGGTGGAGCAAA                                                                                     |
| ASV567  | Bacteria | Proteobacteria | Gammaproteobacteria | Oceanospirillales  | Halomonadaceae     | Halomonas                   | 3                | 1187                   | 0                  | 0                               | 1                           | 16                   | 3                | 90                              | 17                          | 1081  | TGGGGAATTTGGCAATGGGGCAACCGCTGATCCAGCATGCCGGTGTGAGGAAGGCTTCGGTGTAAAGCACTT<br>TCAGTGGGAAGAAAGGCTGTGGTAACTCCGTCAGGAAGGACATCACCCAGGAAGACCGGCTACTCGTGGCC<br>AGCACCGGTAATACGAGGGTGGAGCGTAACTCGAATCTGGCGTAAAGCGGCTAGGCTGTAAAGCACTT<br>GTTTGAAGAACCCCGGCTCAACTGGGAGTGGAGTGGAGTGGAGTGGAGTGGAGTGGAGTGGAGTGGAGTGGAGT<br>CCGCTGACCGGTAATGCTAGATATCGGAGGAATACAGTGGGAGGCGGCTTCGGTGTAAAGCACTT<br>GTGCGAAGCTGGTGGAGCAAA                                                                                    |
| ASV429  | Bacteria | Proteobacteria | Gammaproteobacteria | Pseudomonadales    | Pseudomonadaceae   | Pseudomonas                 | 3                | 2165                   | 0                  | 0                               | 5                           | 397                  | 3                | 163                             | 17                          | 1605  | TGGGGAATTTGGCAATGGGGCAACCGCTGATCCAGCATGCCGGTGTGAGGAAGGCTTCGGTGTAAAGCACTT<br>TTAGTTGGGAGGAAGGGGAGTAACTAACTGATGTTTGGAGTTACCGACAGATAAGCACCGGTAACCTGTGCCA<br>GCAGCCGGTAATACAGAGGGTGAAGCGTAACTCGAATCTGGCGTAAAGCGCACCGGCGTTTGAAGTTGG<br>ATGTGAATCCCGGGCTCAACTGGGAGTGGAGTGGAGTGGAGTGGAGTGGAGTGGAGTGGAGTGGAGTGGAGT<br>GTGTAGCGTGAATGCTAGATATAGGAAGAACACAGTGGGGAAGGCAACCCCTGGACTGACTGACTGACAGGT<br>GCAGAAAGCTGGGAGCAAA                                                                              |
| ASV242  | Bacteria | Proteobacteria | Gammaproteobacteria | Enterobacteriales  | Enterobacteriaceae | Escherichia/Shigella        | 4                | 5114                   | 0                  | 0                               | 4                           | 555                  | 3                | 59                              | 24                          | 4500  | TGGGGAATTTGGCAATGGGGCAACCGCTGATCCAGCATGCCGGTGTGAGGAAGGCTTCGGTGTAAAGCACTT<br>TTGTAGGGAAGAAAGGCTAGTTTAAATAAATGATGATGAGCGTACTAAGATAGACCGGTAACCTAGTGGC<br>GCAGCCGGTAATACGAGGGTGAAGCGTAACTCGAATCTGGCGTAAAGCGCACCGGCGTTTGAAGTCA<br>GATGTGAATCCCGGGCTCAACTGGGAGTGGAGTGGAGTGGAGTGGAGTGGAGTGGAGTGGAGTGGAGTGGAGT<br>GTGTAGCGTGAATGCTAGATATCGGAGGAATACCGTGGGAGGCGGCTTCGGTGTAAAGCACTT<br>TGGGGAAGCTGGGAGCAAA                                                                                           |
| ASV665  | Bacteria | Proteobacteria | Gammaproteobacteria | Burkholderiales    | Neisseriaceae      | NA                          | 3                | 875                    | 1                  | 27                              | 3                           | 260                  | 3                | 46                              | 7                           | 542   | TGGGGAATTTGGCAATGGGGCAACCGCTGATCCAGCATGCCGGTGTGAGGAAGGCTTCGGTGTAAAGCACTT<br>TTAGTTGGGAGGAAGGGGAGTAACTAACTGATGTTTGGAGTTACCGACAGATAAGCACCGGTAACCTGTGCCA<br>GCAGCCGGTAATACAGAGGGTGAAGCGTAACTCGAATCTGGCGTAAAGCGCACCGGCGTTTGAAGTTGG<br>ATGTGAATCCCGGGCTCAACTGGGAGTGGAGTGGAGTGGAGTGGAGTGGAGTGGAGTGGAGTGGAGTGGAGT<br>GTGTAGCGTGAATGCTAGATATCGGAGGAATACAGTGGGGAAGGCAACCCCTGGACTGACTGACTGACAGGT<br>TGGGGAAGCTGGGAGCAAA                                                                              |
| ASV1205 | Bacteria | Bacteroidota   | Bacteroidia         | Flavobacteriales   | Cryomorphaceae     | NA                          | 2                | 245                    | 0                  | 0                               | 3                           | 88                   | 3                | 135                             | 5                           | 22    | TGGGGAATTTGGCAATGGGGCAACCGCTGATCCAGCATGCCGGTGTGAGGAAGGCTTCGGTGTAAAGCACTT<br>TTGTAGGGAAGAAAGGCTAGTTTAAATAAATGATGATGAGCGTACTAAGATAGACCGGTAACCTAGTGGC<br>GCAGCCGGTAATACGAGGGTGAAGCGTAACTCGAATCTGGCGTAAAGCGCACCGGCGTTTGAAGTCA<br>GATGTGAATCCCGGGCTCAACTGGGAGTGGAGTGGAGTGGAGTGGAGTGGAGTGGAGTGGAGTGGAGTGGAGT<br>GTGTAGCGTGAATGCTAGATATCGGAGGAATACAGTGGGGAAGGCAACCCCTGGACTGACTGACTGACAGGT<br>TGGGGAAGCTGGGAGCAAA                                                                                  |
| ASV1326 | Bacteria | Proteobacteria | Alphaproteobacteria | Puniceispirillales | SAR116_clade       | Candidatus_Puniceispirillum | 3                | 174                    | 3                  | 42                              | 3                           | 44                   | 3                | 66                              | 5                           | 22    | TGGGGAATTTGGCAATGGGGCAACCGCTGATCCAGCATGCCGGTGTGAGGAAGGCTTCGGTGTAAAGCACTT<br>TTGTAGGGAAGAAAGGCTAGTTTAAATAAATGATGATGAGCGTACTAAGATAGACCGGTAACCTAGTGGC<br>GCAGCCGGTAATACGAGGGTGAAGCGTAACTCGAATCTGGCGTAAAGCGCACCGGCGTTTGAAGTCA<br>GATGTGAATCCCGGGCTCAACTGGGAGTGGAGTGGAGTGGAGTGGAGTGGAGTGGAGTGGAGTGGAGTGGAGT<br>GTGTAGCGTGAATGCTAGATATCGGAGGAATACAGTGGGGAAGGCAACCCCTGGACTGACTGACTGACAGGT<br>TGGGGAAGCTGGGAGCAAA                                                                                  |
| ASV335  | Bacteria | Proteobacteria | Gammaproteobacteria | Pseudomonadales    | Pseudomonadaceae   | Pseudomonas                 | 3                | 3238                   | 0                  | 0                               | 2                           | 226                  | 3                | 60                              | 17                          | 2952  | TGGGGAATTTGGCAATGGGGCAACCGCTGATCCAGCATGCCGGTGTGAGGAAGGCTTCGGTGTAAAGCACTT<br>TTAGTTGGGAGGAAGGGGAGTAACTAACTGATGTTTGGAGTTACCGACAGATAAGCACCGGTAACCTGTGCCA<br>GCAGCCCGGTAATACGAGGGTGAAGCGTAACTCGAATCTGGCGTAAAGCGGCTAGGCTGTAAAGTTGG<br>ATGTGAATCCCGGGCTCAACTGGGAGTGGAGTGGAGTGGAGTGGAGTGGAGTGGAGTGGAGTGGAGTGGAGT<br>GTGTAGCGTGAATGCTAGATATAGGAAGAACACAGTGGGGAAGGCAACCCCTGGACTGACTGACTGACAGGT<br>GCAGAAAGCTGGGAGCAAA                                                                               |
| ASV556  | Bacteria | Firmicutes     | Bacilli             | Bacillales         | Planococcaceae     | Lysinibacillus              | 2                | 1281                   | 0                  | 0                               | 2                           | 108                  | 3                | 153                             | 12                          | 1020  | TAGGGAATCTCCCAATGGGCAAGCGTGAAGCAACCGCGGCTGAGTGAAGGATTTGCGTGTAAAGCACTCTG<br>TTTGAAGGAAGAAAGTACAGTACGATGACTGGCTACTGACGCTACTACGAATAAGGATGGCTACTCGTCCAGAGCC<br>GCAGCCCGGTAATACGAGGGTGAAGCGTAACTCGAATCTGGCGTAAAGCGGCTAGGCTGTAAAGTTGG<br>ATGTGAATCCCGGGCTCAACTGGGAGTGGAGTGGAGTGGAGTGGAGTGGAGTGGAGTGGAGTGGAGTGGAGT<br>GTGTAGCGTGAATGCTAGATATGAGGAAGAACACAGTGGGGAAGGCAACCCCTGGACTGACTGACTGACAGGT<br>GCAGAAAGCTGGGAGCAAA                                                                            |
| ASV764  | Bacteria | Bacteroidota   | Bacteroidia         | Flavobacteriales   | Cryomorphaceae     | NA                          | 5                | 667                    | 5                  | 70                              | 5                           | 96                   | 2                | 29                              | 7                           | 472   | TGGGGAATTTGGCAATGGGGCAACCGCTGATCCAGCATGCCGGTGTGAGGAAGGCTTCGGTGTAAAGCACTT<br>TTATAGAGGAAGAAAGTGTCTACTGTAGCAACTGCGTACTACGAATAAGGATGGCTACTCGTCCAGAGCC<br>CGGTAATACGAGGGTGAAGCGTAACTCGAATCTGGCGTAAAGCGGCTAGGCTGTAAAGTTGG<br>AAGCGCACGCTCAACTGGGAGTGGAGTGGAGTGGAGTGGAGTGGAGTGGAGTGGAGTGGAGTGGAGTGGAGT<br>CGTGAATGCTAGATATGACTGACGAAACCGATGGGGAAGGCAACCCCTGGACTGACTGACTGACAGGT<br>CTGGGAGCAAA                                                                                                    |
| ASV262  | Bacteria | Firmicutes     | Bacilli             | Lactobacillales    | Carnobacteriaceae  | Carnobacterium              | 3                | 4665                   | 0                  | 0                               | 4                           | 820                  | 2                | 198                             | 17                          | 3647  | TGGGGAATTTGGCAATGGGGCAACCGCTGATCCAGCATGCCGGTGTGAGGAAGGCTTCGGTGTAAAGCACTT<br>TTGTAGGGAAGAAAGGCTAGTTTAAATAAATGATGATGAGCGTACTAAGATAGACCGGTAACCTAGTGGC<br>GCAGCCCGGTAATACGAGGGTGAAGCGTAACTCGAATCTGGCGTAAAGCGGCTAGGCTGTAAAGTTGG<br>ATGTGAATCCCGGGCTCAACTGGGAGTGGAGTGGAGTGGAGTGGAGTGGAGTGGAGTGGAGTGGAGTGGAGT<br>GTGTAGCGTGAATGCTAGATATGAGGAAGAACACAGTGGGGAAGGCAACCCCTGGACTGACTGACTGACAGGT<br>TGGGGAAGCTGGGAGCAAA                                                                                 |
| ASV340  | Bacteria | Firmicutes     | Bacilli             | Bacillales         | Bacillaceae        | Bacillus                    | 5                | 3183                   | 0                  | 0                               | 4                           | 106                  | 2                | 39                              | 39                          | 3038  | TGGGGAATTTGGCAATGGGGCAACCGCTGATCCAGCATGCCGGTGTGAGGAAGGCTTCGGTGTAAAGCACTT<br>TTGTAGGGAAGAAAGGCTAGTTTAAATAAATGATGATGAGCGTACTAAGATAGACCGGTAACCTAGTGGC<br>GCAGCCCGGTAATACGAGGGTGAAGCGTAACTCGAATCTGGCGTAAAGCGCACCGGCGTTTGAAGTCA<br>GATGTGAATCCCGGGCTCAACTGGGAGTGGAGTGGAGTGGAGTGGAGTGGAGTGGAGTGGAGTGGAGTGGAGT<br>GTGTAGCGTGAATGCTAGATATGAGGAAGAACACAGTGGGGAAGGCAACCCCTGGACTGACTGACTGACAGGT<br>CAGTGTAGCGTGAATGCTAGATATGAGGAAGAACACAGTGGGGAAGGCAACCCCTGGACTGACTGACTGACAGGT<br>GCAGAAAGCTGGGAGCAAA |



Table S7. ASVs identified as potential contaminants

| ASV no. | Phylum   | Class            | Order               | Family            | Genus              | Total prevalence (%) | Total read count | Vaginal prevalence (%) | Vaginal read count | Cutaneous penile prevalence (%) | Cutaneous penile read count | Urine prevalence (%) | Urine read count | Negative control prevalence (%) | Negative control read count | Notes | Sequence                                                                                                                                                                                                                                                                                                                                                                                                                               |
|---------|----------|------------------|---------------------|-------------------|--------------------|----------------------|------------------|------------------------|--------------------|---------------------------------|-----------------------------|----------------------|------------------|---------------------------------|-----------------------------|-------|----------------------------------------------------------------------------------------------------------------------------------------------------------------------------------------------------------------------------------------------------------------------------------------------------------------------------------------------------------------------------------------------------------------------------------------|
| ASV1415 | Bacteria | Proteobacteria   | Gammaproteobacteria | Enterobacteriales | Morganellaceae     | Proteus              | 1                | 158                    | 0                  | 0                               | 1                           | 29                   | 1                | 20                              | 2                           | 109   | TGGGGAATTTGCACAAATGGGCGAAGCCCTGATCGACCATCGCCGGTGTATGAAAGAGCCGCTTAAAGATTCTTCAGCGGGAGAGAGGTAAAGTAATAACTTCTATCAATGAGCTTACCGCAGAGAAAGCCCGCTACTCCGTGCCAGCAGCCGGTAATACGAGGGGTCAAGCGTAAACGAGGGTCAAGCGTAAATCGAATTACTGGCGTAAGCGCAGCAGCGCGCTCAATTAAGTCTAGATGTAAAGCCCCCGCTAACTTGGGAATTCGACTGAACCTGGTGGCTGAGACTCTGTAGAGGGGGGTAAATCTCCAGTGTACGGGTGAAATCGGTAGAGATCGGAGAAATCCCGGTGGGAAGGGGGCCCCCTGGCAAAAGACTGACGCTCAGGTGCGAAAGCGTGGGGAGCAACA          |
| ASV1398 | Bacteria | Proteobacteria   | Alphaproteobacteria | Caulobacteriales  | Caulobacteraceae   | Brevundimonas        | 1                | 162                    | 0                  | 0                               | 1                           | 137                  | 1                | 2                               | 12                          |       | TGGGGAATCTGGCAATGGGCGAAGCCCTGACGACGACATCGCCGGTGAATGAAGCTCTTAAAGTCTTTCACCGGGAGAGATAAGCGTACCGGAGAAAGAGCCCGCTAACTCTGCGCAGAGCCGGTAAATACGAGGGGCTAGCGTGTCTGGGAATCTGGCGGTAAAGGGGGCGTAGGGGGATGTTAAGTCAGAGGTGAATCCAGGGCTCAACCCTGGAATCGTCTGATCTGGCGATCTGAGTATGAGAGAGATGTGGAACTCCGAGTCCGAGGTAGAGGGTAAATCTGATATTCGGAAGACCAAGTGGCGAAGCGACACTGGCTCAATTCGACGCTGAGGCGGAAGCGTGGGGAGCAACA                                                                |
| ASV785  | Bacteria | Actinobacteriota | Actinobacteria      | Micrococcales     | Micrococcaceae     | Nesterenkonia        | 1                | 650                    | 0                  | 0                               | 0                           | 0                    | 1                | 51                              | 2                           | 599   | TGGGGAATTTGCACAAATGGGCGAAGCCCTGATCGACGACCGCCGGTGGGGATGACGCTCTCGGATGTAACCCCTTCAGTAGGGAGCAAGCGAAGTGCAGTACTCGAGAAAGAACCCCGCAACTCGTCCAGACCGCGGTAACTAGGGTGGAGCGTTGTCGGAAATCTGGCGTAAAGAGCTTGAAGGGCTTTCGCGTCTGTGAAAGTCCGGGGCTTAAACCCCGACTCTGGGGTAAAGGAGTCTAGTGGAGACTGGAAATCTCTGTGTAAGCCGGGGCTTACCTCGGTGTAGTGGTGTAGCGCACAGTAGTGCATGAGGGAGACTGGAACTCTGTGTAGCGTAAATCGGCAGATATCAGGAAACACCGTGGCGAAGCGAGCTCTGGGCTTACTGACGCTGAGGAGCAAGACTGGGAGCGAACA |
| ASV679  | Bacteria | Actinobacteriota | Actinobacteria      | Corynebacteriales | Dietziaceae        | Dietzia              | 2                | 839                    | 0                  | 0                               | 5                           | 296                  | 1                | 56                              | 2                           | 487   | TGGGGAATTTGCACAAATGGGCGAAGCCCTGATCGACGACCGCCGGTGGGGATGACGCTCTCGGATGTAACCCCTTCAGTAGGGAAGAAAGGAGTGAAGTACTCGTAGAAGAACCCGCTAACTACGTCCAGACCGCCGGTAACTAGCTAGGGTGGAGCGTTATCCGGAATTTGGGCTAAAGAGCTGTAGGGGTTTGGCGTCTGTGTAAGTCCGGGGCTTAAACCCCGACTCTGGGGTAAAGGAGTCTAGTGGAGACTGGAAATCTCTGTGTAAGCCGGGGCTTACGAGATATCAGGAGAACCCGTTGGCGAAGCGGCTCTGGGTAGTAAGTCAAGCCTGAGGAGCAAGACTGGGAGCGAACA                                                             |
| ASV529  | Bacteria | Actinobacteriota | Actinobacteria      | Micrococcales     | Micrococcaceae     | Micrococcus          | 2                | 1400                   | 0                  | 0                               | 5                           | 767                  | 1                | 204                             | 2                           | 429   | TGGGGAATTTGCACAAATGGGCGAAGCCCTGATCGACGACCGCCGGTGGGGATGACGCTCTCGGATGTAACCCCTTCAGTAGGGAAGAAAGGAGTGAAGTACTCGTAGAAGAACCCGCTAACTACGTCCAGACCGCCGGTAACTAGCTAGGGTGGAGCGTTATCCGGAATTTGGGCTAAAGAGCTGTAGGGGTTTGGCGTCTGTGTAAGTCCGGGGCTTAAACCCCGACTCTGGGGTAAAGGAGTCTAGTGGAGACTGGAAATCTCTGTGTAAGCCGGGGCTTACGAGATATCAGGAGAACCCGTTGGCGAAGCGGCTCTGGGTAGTAAGTCAAGCCTGAGGAGCAAGACTGGGAGCGAACA                                                             |
| ASV895  | Bacteria | Proteobacteria   | Gammaproteobacteria | Pseudomonadales   | Moraxellaceae      | Acinetobacter        | 2                | 484                    | 0                  | 0                               | 3                           | 133                  | 1                | 56                              | 7                           | 295   | TGGGGAATTTGCACAAATGGGCGAAGCCCTGATCGACGACCGCCGGTGGGGATGACGCTCTCGGATGTAACCCCTTCAGTAGGGAAGAAAGGAGTGAAGTACTCGTAGAAGAACCCGCTAACTACGTCCAGACCGCCGGTAACTAGCTAGGGTGGAGCGTTATCCGGAATTTGGGCTAAAGAGCTGTAGGGGTTTGGCGTCTGTGTAAGTCCGGGGCTTAAACCCCGACTCTGGGGTAAAGGAGTCTAGTGGAGACTGGAAATCTCTGTGTAAGCCGGGGCTTACGAGATATCAGGAGAACCCGTTGGCGAAGCGGCTCTGGGTAGTAAGTCAAGCCTGAGGAGCAAGACTGGGAGCGAACA                                                             |
| ASV466  | Bacteria | Proteobacteria   | Gammaproteobacteria | Aeromonadales     | Aeromonadaceae     | Aeromonas            | 1                | 1826                   | 0                  | 0                               | 1                           | 139                  | 1                | 7                               | 7                           | 1680  | TGGGGAATTTGCACAAATGGGCGAAGCCCTGATCGACGACCGCCGGTGGGGATGACGCTCTCGGATGTAACCCCTTCAGTAGGGAAGAAAGGAGTGAAGTACTCGTAGAAGAACCCGCTAACTACGTCCAGACCGCCGGTAACTAGCTAGGGTGGAGCGTTATCCGGAATTTGGGCTAAAGAGCTGTAGGGGTTTGGCGTCTGTGTAAGTCCGGGGCTTAAACCCCGACTCTGGGGTAAAGGAGTCTAGTGGAGACTGGAAATCTCTGTGTAAGCCGGGGCTTACGAGATATCAGGAGAACCCGTTGGCGAAGCGGCTCTGGGTAGTAAGTCAAGCCTGAGGAGCAAGACTGGGAGCGAACA                                                             |
| ASV835  | Bacteria | Proteobacteria   | Gammaproteobacteria | Enterobacteriales | Enterobacteriaceae | Citrobacter          | 1                | 567                    | 0                  | 0                               | 1                           | 22                   | 1                | 27                              | 7                           | 518   | TGGGGAATTTGCACAAATGGGCGAAGCCCTGATCGACGACCGCCGGTGGGGATGACGCTCTCGGATGTAACCCCTTCAGTAGGGAAGAAAGGAGTGAAGTACTCGTAGAAGAACCCGCTAACTACGTCCAGACCGCCGGTAACTAGCTAGGGTGGAGCGTTATCCGGAATTTGGGCTAAAGAGCTGTAGGGGTTTGGCGTCTGTGTAAGTCCGGGGCTTAAACCCCGACTCTGGGGTAAAGGAGTCTAGTGGAGACTGGAAATCTCTGTGTAAGCCGGGGCTTACGAGATATCAGGAGAACCCGTTGGCGAAGCGGCTCTGGGTAGTAAGTCAAGCCTGAGGAGCAAGACTGGGAGCGAACA                                                             |
| ASV1321 | Bacteria | Proteobacteria   | Gammaproteobacteria | Pseudomonadales   | Pseudomonadaceae   | Pseudomonas          | 1                | 171                    | 0                  | 0                               | 1                           | 139                  | 1                | 16                              | 2                           | 16    | TGGGGAATTTGCACAAATGGGCGAAGCCCTGATCGACGACCGCCGGTGGGGATGACGCTCTCGGATGTAACCCCTTCAGTAGGGAAGAAAGGAGTGAAGTACTCGTAGAAGAACCCGCTAACTACGTCCAGACCGCCGGTAACTAGCTAGGGTGGAGCGTTATCCGGAATTTGGGCTAAAGAGCTGTAGGGGTTTGGCGTCTGTGTAAGTCCGGGGCTTAAACCCCGACTCTGGGGTAAAGGAGTCTAGTGGAGACTGGAAATCTCTGTGTAAGCCGGGGCTTACGAGATATCAGGAGAACCCGTTGGCGAAGCGGCTCTGGGTAGTAAGTCAAGCCTGAGGAGCAAGACTGGGAGCGAACA                                                             |
| ASV413  | Bacteria | Proteobacteria   | Gammaproteobacteria | Pseudomonadales   | Pseudomonadaceae   | Pseudomonas          | 2                | 2337                   | 0                  | 0                               | 0                           | 0                    | 1                | 6                               | 22                          | 2311  | TGGGGAATTTGCACAAATGGGCGAAGCCCTGATCGACGACCGCCGGTGGGGATGACGCTCTCGGATGTAACCCCTTCAGTAGGGAAGAAAGGAGTGAAGTACTCGTAGAAGAACCCGCTAACTACGTCCAGACCGCCGGTAACTAGCTAGGGTGGAGCGTTATCCGGAATTTGGGCTAAAGAGCTGTAGGGGTTTGGCGTCTGTGTAAGTCCGGGGCTTAAACCCCGACTCTGGGGTAAAGGAGTCTAGTGGAGACTGGAAATCTCTGTGTAAGCCGGGGCTTACGAGATATCAGGAGAACCCGTTGGCGAAGCGGCTCTGGGTAGTAAGTCAAGCCTGAGGAGCAAGACTGGGAGCGAACA                                                             |
| ASV912  | Bacteria | Bacteroidota     | Bacteroidia         | Flavobacteriales  | Weeksellaceae      | Cloacibacterium      | 0                | 458                    | 0                  | 0                               | 0                           | 0                    | 1                | 58                              | 2                           | 400   | TGGGGAATTTGCACAAATGGGCGAAGCCCTGATCGACGACCGCCGGTGGGGATGACGCTCTCGGATGTAACCCCTTCAGTAGGGAAGAAAGGAGTGAAGTACTCGTAGAAGAACCCGCTAACTACGTCCAGACCGCCGGTAACTAGCTAGGGTGGAGCGTTATCCGGAATTTGGGCTAAAGAGCTGTAGGGGTTTGGCGTCTGTGTAAGTCCGGGGCTTAAACCCCGACTCTGGGGTAAAGGAGTCTAGTGGAGACTGGAAATCTCTGTGTAAGCCGGGGCTTACGAGATATCAGGAGAACCCGTTGGCGAAGCGGCTCTGGGTAGTAAGTCAAGCCTGAGGAGCAAGACTGGGAGCGAACA                                                             |
| ASV973  | Bacteria | Proteobacteria   | Alphaproteobacteria | Rhizobiales       | Rhizobiaceae       | Pseudochrobactrum    | 0                | 394                    | 0                  | 0                               | 0                           | 1                    | 32               | 2                               | 362                         |       | TGGGGAATTTGCACAAATGGGCGAAGCCCTGATCGACGACCGCCGGTGGGGATGACGCTCTCGGATGTAACCCCTTCAGTAGGGAAGAAAGGAGTGAAGTACTCGTAGAAGAACCCGCTAACTACGTCCAGACCGCCGGTAACTAGCTAGGGTGGAGCGTTATCCGGAATTTGGGCTAAAGAGCTGTAGGGGTTTGGCGTCTGTGTAAGTCCGGGGCTTAAACCCCGACTCTGGGGTAAAGGAGTCTAGTGGAGACTGGAAATCTCTGTGTAAGCCGGGGCTTACGAGATATCAGGAGAACCCGTTGGCGAAGCGGCTCTGGGTAGTAAGTCAAGCCTGAGGAGCAAGACTGGGAGCGAACA                                                             |
| ASV992  | Bacteria | Firmicutes       | Bacilli             | Bacillales        | Bacillaceae        | Anaerobacillus       | 0                | 376                    | 0                  | 0                               | 0                           | 0                    | 1                | 23                              | 2                           | 353   | TGGGGAATTTGCACAAATGGGCGAAGCCCTGATCGACGACCGCCGGTGGGGATGACGCTCTCGGATGTAACCCCTTCAGTAGGGAAGAAAGGAGTGAAGTACTCGTAGAAGAACCCGCTAACTACGTCCAGACCGCCGGTAACTAGCTAGGGTGGAGCGTTATCCGGAATTTGGGCTAAAGAGCTGTAGGGGTTTGGCGTCTGTGTAAGTCCGGGGCTTAAACCCCGACTCTGGGGTAAAGGAGTCTAGTGGAGACTGGAAATCTCTGTGTAAGCCGGGGCTTACGAGATATCAGGAGAACCCGTTGGCGAAGCGGCTCTGGGTAGTAAGTCAAGCCTGAGGAGCAAGACTGGGAGCGAACA                                                             |
| ASV1004 | Bacteria | Proteobacteria   | Alphaproteobacteria | Rhizobiales       | Rhizobiaceae       | Phyllobacterium      | 2                | 366                    | 0                  | 0                               | 3                           | 310                  | 0                | 7                               | 56                          |       | TGGGGAATTTGCACAAATGGGCGAAGCCCTGATCGACGACCGCCGGTGGGGATGACGCTCTCGGATGTAACCCCTTCAGTAGGGAAGAAAGGAGTGAAGTACTCGTAGAAGAACCCGCTAACTACGTCCAGACCGCCGGTAACTAGCTAGGGTGGAGCGTTATCCGGAATTTGGGCTAAAGAGCTGTAGGGGTTTGGCGTCTGTGTAAGTCCGGGGCTTAAACCCCGACTCTGGGGTAAAGGAGTCTAGTGGAGACTGGAAATCTCTGTGTAAGCCGGGGCTTACGAGATATCAGGAGAACCCGTTGGCGAAGCGGCTCTGGGTAGTAAGTCAAGCCTGAGGAGCAAGACTGGGAGCGAACA                                                             |
| ASV1168 | Bacteria | Proteobacteria   | Gammaproteobacteria | Pseudomonadales   | Pseudomonadaceae   | Pseudomonas          | 1                | 260                    | 0                  | 0                               | 2                           | 152                  | 0                | 0                               | 2                           | 108   | TGGGGAATTTGCACAAATGGGCGAAGCCCTGATCGACGACCGCCGGTGGGGATGACGCTCTCGGATGTAACCCCTTCAGTAGGGAAGAAAGGAGTGAAGTACTCGTAGAAGAACCCGCTAACTACGTCCAGACCGCCGGTAACTAGCTAGGGTGGAGCGTTATCCGGAATTTGGGCTAAAGAGCTGTAGGGGTTTGGCGTCTGTGTAAGTCCGGGGCTTAAACCCCGACTCTGGGGTAAAGGAGTCTAGTGGAGACTGGAAATCTCTGTGTAAGCCGGGGCTTACGAGATATCAGGAGAACCCGTTGGCGAAGCGGCTCTGGGTAGTAAGTCAAGCCTGAGGAGCAAGACTGGGAGCGAACA                                                             |

Table S7. ASVs identified as potential contaminants

| ASV no. | Phylum   | Class           | Order               | Family                  | Genus            | Total prevalence (%) | Total read count | Vaginal prevalence (%) | Vaginal read count | Cutaneous penile prevalence (%) | Cutaneous penile read count | Urine prevalence (%) | Urine read count | Negative control prevalence (%) | Negative control read count | Notes | Sequence                                                                                                                                                                                                                                                                                                                                                                                                                    |
|---------|----------|-----------------|---------------------|-------------------------|------------------|----------------------|------------------|------------------------|--------------------|---------------------------------|-----------------------------|----------------------|------------------|---------------------------------|-----------------------------|-------|-----------------------------------------------------------------------------------------------------------------------------------------------------------------------------------------------------------------------------------------------------------------------------------------------------------------------------------------------------------------------------------------------------------------------------|
| ASV181  | Bacteria | Proteobacteria  | Gammaproteobacteria | Burkholderiales         | Alcaligenaceae   | Achromobacter        | 1                | 255                    | 0                  | 0                               | 2                           | 244                  | 0                | 0                               | 2                           | 11    | TGGGGAAATTTGGACATGGGGGAACCCCTGATCCAGCAATGCCCGTGTGTGGAAGAAGCCCTCGGGTTGTAAGCAACTTTTGGAGGAAGAAGAGCTGTGGTTAATACCCCTGGAACTGACGGTACCTGGAATAAGCCCGCTAACCTAGCTGCCACGAGCCGGTAATCGTAGAGGCGTCAAGCGTAACTCGAATCTACTGGAAGTAACTGCGGCGTAAAGCGTCCGAGCGGTTATCGAAGAAAGATGTGAATCCCAAGAGCTAACTTTGGAACTGATTTAACTACCGCGTAGAGTGTCCAGAGGAAGGGAATCCCGCTGTAGAGCTGAATCGTAGATATGCGGAGGAACACCGATGGGGAAGGACCGCTCTGGGATAACACTGACCTCATGACGAAAGCGTGGGGAGCAACA |
| ASV720  | Bacteria | Proteobacteria  | Gammaproteobacteria | Burkholderiales         | Comamonadaceae   | Pelomonas            | 1                | 736                    | 0                  | 0                               | 1                           | 52                   | 0                | 0                               | 12                          | 684   | TGGGGAAATTTGGACATGGGGGAACCCCTGATCCAGCAATGCCCGTGTGGAAGAAGCCCTCGGGTTGTAAGCAACTTTTTCAGGGGAAGAAGAGCTGTGGTTAATACCTGGAACTGACGGTACCTGGAATAAGCCCGCTAACCTAGCTGCCAGCAGCCCGGTAATACGAGGGTCAAGCGTAACTGGAATACTGGCGTAAAGCGTCCGAGCGGCTTATCGAAGACAGAGGTGAATCCCGGGCTCAACTGGAACTGCCTTTGTGACTGATAGCTAGAGTACGTTAGAGGGGATGGAATTCGCGTGTAGAGCTGAATCGTAGATATGCGGAGGAACACCGATGGGGAAGGACCCCTGGGATAACACTGACCTCATGACGAAAGCGTGGGGAGCAACA                  |
| ASV176  | Bacteria | Proteobacteria  | Gammaproteobacteria | Burkholderiales         | Oxalobacteraceae | Herbaspirillum       | 1                | 133                    | 0                  | 0                               | 1                           | 73                   | 0                | 0                               | 5                           | 60    | TGGGGAAATTTGGACATGGGGGAACCCCTGATCCAGCAATGCCCGTGTGGAAGAAGCCCTCGGGTTGTAAGCAACTTTTTCAGGGGAAGAAGAGCTGTGGTTAATACCTGGAACTGACGGTACCTGGAATAAGCCCGCTAACCTAGCTGCCAGCAGCCCGGTAATACGAGGGTCAAGCGTAACTGGAATACTGGCGTAAAGCGTCCGAGCGGTTGGAAGAAGAAGATGTGAATCCCAAGAGCTAACTTTGGAACTGATTTAACTACCGCGTAGAGTGTCCAGAGGAAGGGAATTCGCGTGTAGAGCTGAATCGTAGATATGCGGAGGAACACCGATGGGGAAGGACCCCTGGGATAACACTGACCTCATGACGAAAGCGTGGGGAGCAACA                     |
| ASV507  | Bacteria | Proteobacteria  | Gammaproteobacteria | Burkholderiales         | Alcaligenaceae   | Achromobacter        | 1                | 1470                   | 0                  | 0                               | 1                           | 3                    | 0                | 0                               | 10                          | 1467  | TGGGGAAATTTGGACATGGGGGAACCCCTGATCCAGCAATGCCCGTGTGGAAGAAGCCCTCGGGTTGTAAGCAACTTTTTCAGGGGAAGAAGAGCTGTGGTTAATACCTGGAACTGACGGTACCTGGAATAAGCCCGCTAACCTAGCTGCCAGCAGCCCGGTAATACGAGGGTCAAGCGTAACTGGAATACTGGCGTAAAGCGTCCGAGCGGTTGGAAGAAGAAGATGTGAATCCCAAGAGCTAACTTTGGAACTGATTTAACTACCGCGTAGAGTGTCCAGAGGAAGGGAATTCGCGTGTAGAGCTGAATCGTAGATATGCGGAGGAACACCGATGGGGAAGGACCCCTGGGATAACACTGACCTCATGACGAAAGCGTGGGGAGCAACA                     |
| ASV494  | Bacteria | Proteobacteria  | Gammaproteobacteria | Burkholderiales         | Oxalobacteraceae | Duganella            | 1                | 1589                   | 0                  | 0                               | 1                           | 141                  | 0                | 0                               | 7                           | 1448  | TGGGGAAATTTGGACATGGGGGAACCCCTGATCCAGCAATGCCCGTGTGGAAGAAGCCCTCGGGTTGTAAGCAACTTTTTCAGGGGAAGAAGAGCTGTGGTTAATACCTGGAACTGACGGTACCTGGAATAAGCCCGCTAACCTAGCTGCCAGCAGCCCGGTAATACGAGGGTCAAGCGTAACTGGAATACTGGCGTAAAGCGTCCGAGCGGTTGGAAGAAGAAGATGTGAATCCCAAGAGCTAACTTTGGAACTGATTTAACTACCGCGTAGAGTGTCCAGAGGAAGGGAATTCGCGTGTAGAGCTGAATCGTAGATATGCGGAGGAACACCGATGGGGAAGGACCCCTGGGATAACACTGACCTCATGACGAAAGCGTGGGGAGCAACA                     |
| ASV810  | Bacteria | Patescibacteria | Gracilibacteria     | Candidatus_Peribacteria | NA               | NA                   | 0                | 608                    | 0                  | 0                               | 1                           | 83                   | 0                | 0                               | 2                           | 525   | TTAGGAACTTCCAAATGGGGCAAGCCCTGATCCAGCAATGCCCGTGTGGAAGAAGCCCTCGGGTTGTAAGCAACTTTTTCAGGGGAAGAAGAGCTGTGGTTAATACCTGGAACTGACGGTACCTGGAATAAGCCCGCTAACCTAGCTGCCAGCAGCGGTAATACGAGGGTCAAGCGTAACTGGAATACTGGCGTAAAGCGTCCGAGCGGTTGGAAGAAGAAGATGTGAATCCCAAGAGCTAACTTTGGAACTGATTTAACTACCGCGTAGAGTGTCCAGAGGAAGGGAATTCGCGTGTAGAGCTGAATCGTAGATATGCGGAGGAACACCGATGGGGAAGGACCCCTGGGATAACACTGACCTCATGACGAAAGCGTGGGGAGCAACA                        |
| ASV1034 | Bacteria | Firmicutes      | Bacilli             | Bacillales              | Bacillaceae      | Bacillus             | 1                | 336                    | 0                  | 0                               | 1                           | 19                   | 0                | 0                               | 7                           | 317   | TAGGGAATTTCCAAATGGGGCAAGCCCTGATCCAGCAATGCCCGTGTGGAAGAAGCCCTCGGGTTGTAAGCAACTTTTTCAGGGGAAGAAGAGCTGTGGTTAATACCTGGAACTGACGGTACCTGGAATAAGCCCGCTAACCTAGCTGCCAGCAGCCCGGTAATACGAGGGTCAAGCGTAACTGGAATACTGGCGTAAAGCGTCCGAGCGGTTGGAAGAAGAAGATGTGAATCCCAAGAGCTAACTTTGGAACTGATTTAACTACCGCGTAGAGTGTCCAGAGGAAGGGAATTCGCGTGTAGAGCTGAATCGTAGATATGCGGAGGAACACCGATGGGGAAGGACCCCTGGGATAACACTGACCTCATGACGAAAGCGTGGGGAGCAACA                      |
| ASV1094 | Bacteria | Proteobacteria  | Gammaproteobacteria | Burkholderiales         | Burkholderiaceae | Ralstonia            | 0                | 300                    | 0                  | 0                               | 1                           | 31                   | 0                | 0                               | 2                           | 269   | TGGGGAAATTTGGACATGGGGGAACCCCTGATCCAGCAATGCCCGTGTGTGGAAGAAGCCCTCGGGTTGTAAGCAACTTTTTCAGGGGAAGAAGAGCTGTGGTTAATACCTGGAACTGACGGTACCTGGAATAAGCCCGCTAACCTAGCTGCCAGCAGCCCGGTAATACGAGGGTCAAGCGTAACTGGAATACTGGCGTAAAGCGTCCGAGCGGTTGGAAGAAGAAGATGTGAATCCCAAGAGCTAACTTTGGAACTGATTTAACTACCGCGTAGAGTGTCCAGAGGAAGGGAATTCGCGTGTAGAGCTGAATCGTAGATATGCGGAGGAACACCGATGGGGAAGGACCCCTGGGATAACACTGACCTCATGACGAAAGCGTGGGGAGCAACA                   |
| ASV1276 | Bacteria | Proteobacteria  | Gammaproteobacteria | Burkholderiales         | Comamonadaceae   | Pelomonas            | 0                | 204                    | 0                  | 0                               | 1                           | 6                    | 0                | 0                               | 2                           | 198   | TGGGGAAATTTGGACATGGGGGAACCCCTGATCCAGCAATGCCCGTGTGGAAGAAGCCCTCGGGTTGTAAGCAACTTTTTCAGGGGAAGAAGAGCTGTGGTTAATACCTGGAACTGACGGTACCTGGAATAAGCCCGCTAACCTAGCTGCCAGCAGCCCGGTAATACGAGGGTCAAGCGTAACTGGAATACTGGCGTAAAGCGTCCGAGCGGTTGGAAGAAGAAGATGTGAATCCCAAGAGCTAACTTTGGAACTGATTTAACTACCGCGTAGAGTGTCCAGAGGAAGGGAATTCGCGTGTAGAGCTGAATCGTAGATATGCGGAGGAACACCGATGGGGAAGGACCCCTGGGATAACACTGACCTCATGACGAAAGCGTGGGGAGCAACA                     |
| ASV1156 | Bacteria | Proteobacteria  | Gammaproteobacteria | Burkholderiales         | Oxalobacteraceae | Herbaspirillum       | 0                | 235                    | 0                  | 0                               | 1                           | 66                   | 0                | 0                               | 2                           | 169   | TGGGGAAATTTGGACATGGGGGAACCCCTGATCCAGCAATGCCCGTGTGGAAGAAGCCCTCGGGTTGTAAGCAACTTTTTCAGGGGAAGAAGAGCTGTGGTTAATACCTGGAACTGACGGTACCTGGAATAAGCCCGCTAACCTAGCTGCCAGCAGCCCGGTAATACGAGGGTCAAGCGTAACTGGAATACTGGCGTAAAGCGTCCGAGCGGTTGGAAGAAGAAGATGTGAATCCCAAGAGCTAACTTTGGAACTGATTTAACTACCGCGTAGAGTGTCCAGAGGAAGGGAATTCGCGTGTAGAGCTGAATCGTAGATATGCGGAGGAACACCGATGGGGAAGGACCCCTGGGATAACACTGACCTCATGACGAAAGCGTGGGGAGCAACA                     |
| ASV407  | Bacteria | Proteobacteria  | Gammaproteobacteria | Legionellales           | Legionellaceae   | Legionella           | 0                | 2399                   | 0                  | 0                               | 0                           | 0                    | 0                | 0                               | 5                           | 2399  | TAGGGAATTTCCAAATGGGGCAAGCCCTGATCCAGCAATGCCCGTGTGGAAGAAGCCCTCGGGTTGTAAGCAACTTTTTCAGGGGAAGAAGAGCTGTGGTTAATACCTGGAACTGACGGTACCTGGAATAAGCCCGCTAACCTAGCTGCCAGCAGCCCGGTAATACGAGGGTCAAGCGTAACTGGAATACTGGCGTAAAGCGTCCGAGCGGTTGGAAGAAGAAGATGTGAATCCCAAGAGCTAACTTTGGAACTGATTTAACTACCGCGTAGAGTGTCCAGAGGAAGGGAATTCGCGTGTAGAGCTGAATCGTAGATATGCGGAGGAACACCGATGGGGAAGGACCCCTGGGATAACACTGACCTCATGACGAAAGCGTGGGGAGCAACA                      |
| ASV564  | Bacteria | Firmicutes      | Bacilli             | Bacillales              | Bacillaceae      | Bacillus             | 0                | 1218                   | 0                  | 0                               | 0                           | 0                    | 0                | 0                               | 2                           | 1218  | TAGGGAATTTCCAAATGGGGCAAGCCCTGATCCAGCAATGCCCGTGTGGAAGAAGCCCTCGGGTTGTAAGCAACTTTTTCAGGGGAAGAAGAGCTGTGGTTAATACCTGGAACTGACGGTACCTGGAATAAGCCCGCTAACCTAGCTGCCAGCAGCCCGGTAATACGAGGGTCAAGCGTAACTGGAATACTGGCGTAAAGCGTCCGAGCGGTTGGAAGAAGAAGATGTGAATCCCAAGAGCTAACTTTGGAACTGATTTAACTACCGCGTAGAGTGTCCAGAGGAAGGGAATTCGCGTGTAGAGCTGAATCGTAGATATGCGGAGGAACACCGATGGGGAAGGACCCCTGGGATAACACTGACCTCATGACGAAAGCGTGGGGAGCAACA                      |
| ASV585  | Bacteria | Firmicutes      | Bacilli             | Bacillales              | Bacillaceae      | Bacillus             | 0                | 1142                   | 0                  | 0                               | 0                           | 0                    | 0                | 0                               | 2                           | 1142  | TAGGGAATTTCCAAATGGGGCAAGCCCTGATCCAGCAATGCCCGTGTGGAAGAAGCCCTCGGGTTGTAAGCAACTTTTTCAGGGGAAGAAGAGCTGTGGTTAATACCTGGAACTGACGGTACCTGGAATAAGCCCGCTAACCTAGCTGCCAGCAGCCCGGTAATACGAGGGTCAAGCGTAACTGGAATACTGGCGTAAAGCGTCCGAGCGGTTGGAAGAAGAAGATGTGAATCCCAAGAGCTAACTTTGGAACTGATTTAACTACCGCGTAGAGTGTCCAGAGGAAGGGAATTCGCGTGTAGAGCTGAATCGTAGATATGCGGAGGAACACCGATGGGGAAGGACCCCTGGGATAACACTGACCTCATGACGAAAGCGTGGGGAGCAACA                      |
| ASV598  | Bacteria | Proteobacteria  | Gammaproteobacteria | Pseudomonadales         | Pseudomonadaceae | Pseudomonas          | 0                | 1073                   | 0                  | 0                               | 0                           | 0                    | 0                | 0                               | 2                           | 1073  | TGGGGAAATTTGGACATGGGGGAACCCCTGATCCAGCAATGCCCGTGTGGAAGAAGCCCTCGGGTTGTAAGCAACTTTTTCAGGGGAAGAAGAGCTGTGGTTAATACCTGGAACTGACGGTACCTGGAATAAGCCCGCTAACCTAGCTGCCAGCAGCCCGGTAATACGAGGGTCAAGCGTAACTGGAATACTGGCGTAAAGCGTCCGAGCGGTTGGAAGAAGAAGATGTGAATCCCAAGAGCTAACTTTGGAACTGATTTAACTACCGCGTAGAGTGTCCAGAGGAAGGGAATTCGCGTGTAGAGCTGAATCGTAGATATGCGGAGGAACACCGATGGGGAAGGACCCCTGGGATAACACTGACCTCATGACGAAAGCGTGGGGAGCAACA                     |
| ASV737  | Bacteria | Proteobacteria  | Gammaproteobacteria | Burkholderiales         | Oxalobacteraceae | Duganella            | 0                | 708                    | 0                  | 0                               | 0                           | 0                    | 0                | 0                               | 5                           | 708   | TGGGGAAATTTGGACATGGGGGAACCCCTGATCCAGCAATGCCCGTGTGGAAGAAGCCCTCGGGTTGTAAGCAACTTTTTCAGGGGAAGAAGAGCTGTGGTTAATACCTGGAACTGACGGTACCTGGAATAAGCCCGCTAACCTAGCTGCCAGCAGCCCGGTAATACGAGGGTCAAGCGTAACTGGAATACTGGCGTAAAGCGTCCGAGCGGTTGGAAGAAGAAGATGTGAATCCCAAGAGCTAACTTTGGAACTGATTTAACTACCGCGTAGAGTGTCCAGAGGAAGGGAATTCGCGTGTAGAGCTGAATCGTAGATATGCGGAGGAACACCGATGGGGAAGGACCCCTGGGATAACACTGACCTCATGACGAAAGCGTGGGGAGCAACA                     |

Table S7. ASVs identified as potential contaminants

| ASV no. | Phylum   | Class        | Order       | Family        | Genus          | Total prevalence (%) | Total read count | Vaginal prevalence (%) | Vaginal read count | Cutaneous penile prevalence (%) | Cutaneous penile read count | Urine prevalence (%) | Urine read count | Negative control prevalence (%) | Negative control read count | Notes | Sequence                                                                                                                                                                                                                                                                                                                                                                                                                                 |
|---------|----------|--------------|-------------|---------------|----------------|----------------------|------------------|------------------------|--------------------|---------------------------------|-----------------------------|----------------------|------------------|---------------------------------|-----------------------------|-------|------------------------------------------------------------------------------------------------------------------------------------------------------------------------------------------------------------------------------------------------------------------------------------------------------------------------------------------------------------------------------------------------------------------------------------------|
| ASV1201 | Bacteria | Bacteroidota | Bacteroidia | Bacteroidales | Muribaculaceae | NA                   | 0                | 247                    | 0                  | 0                               | 0                           | 0                    | 0                | 5                               | 247                         |       | TGAGGAATATTGGTCAATGGGCGEENGLCTGAALCAAGCAJNETGCGTGAEGGAGGAJGGCCLTAGCGDTTETAAMACTCT<br>TTGKCCGGGGAGCAACGGGGCTCACGTGTGGCCACTGAGAGTACCCGGAGAAAAGGATGGCTAACTCGSTGCCAGCA<br>GCCCGGTAATACGGAGGATCGAGCGTTATCCGGATTTATGGGTTAAMAGGTCGTAGGCGGATCGTTAAGTCAGTGG<br>TCAAATTGAGGGGCTCAACCCCTCCCGCATTGAACTGGCGTCTTAGTGGGAAGAGAAATATGCGGAATGCGTGGTGA<br>GCGGTGAATGCATAGATATCACGAGAACCCCGATTGGGAAGGCAGCATGCCGCTCCGACTGACGCTGAAGCAGGAAA<br>GCGTGGGGATCGAACA |
| ASV1268 | Bacteria | Firmicutes   | Bacilli     | Bacillales    | Bacillaceae    | Anaerobacillus       | 0                | 207                    | 0                  | 0                               | 0                           | 0                    | 0                | 5                               | 207                         |       | TAGGGAATCTCCGCAATGGACGAAGTCTGACGGAGCAACGGCGGTGAAGGATGAAGGCCTCGGGTGTAAAGTTCTG<br>TTSTTAGGGAGACAGTACCCTTGAATAGGTGCGTACCTTGAGGTACTACAGAAAGCCAGCTACTACTAGTGC<br>AGCAGCCCGGTAATACGTAGGTGCAAGGTTTCCCGAATATTGGGCGTAAAGCGCGCAGCGGGTCTCTTAAGTCT<br>GATGTAAAGCCCAAGGCTCAACCTGGAGGCCATTGGAACTGGGAGACTGAGTGCAGAAAGGAGAGTGGAAATCC<br>ATGTGTAGCGGTGAATGCGTAGATATATGGAGGAACACAGTGGCGAAGCGACTCTCTGTCTGTACTGACCGTGAAG<br>CCGAAAAGCGTGGGGAGCAACA           |
